# Supplementary material
Source: PubMed Central journal article supplement (PMC3145074)
Supplement: mmc1.pdf [file mmc1.pdf]

# THE LANCET

## **Supplementary webappendix**

This webappendix formed part of the original submission and has been peer reviewed. We post it as supplied by the authors.

Supplement to: The Emerging Risk Factors Collaboration. Separate and combined associations of body-mass index and abdominal adiposity with cardiovascular disease: collaborative analysis of 58 prospective studies. *Lancet* 2011; published online March 11. DOI:10.1016/S0140-6736(11)60105-0.

# Separate and combined associations of body-mass index and abdominal adiposity with cardiovascular disease: collaborative analysis of 58 prospective studies

The Emerging Risk Factors Collaboration

## Supplementary material

### eTables

|                                                                                                                                                                                                                                   |    |
|-----------------------------------------------------------------------------------------------------------------------------------------------------------------------------------------------------------------------------------|----|
| eTable 1 Descriptive summaries, grouped by study, of individuals with complete information on adiposity measures, age and sex .....                                                                                               | 3  |
| eTable 2 Description of methods used to assess adiposity measures in the contributing studies .....                                                                                                                               | 5  |
| eTable 3 Summary of data available and associations with adiposity measures .....                                                                                                                                                 | 8  |
| eTable 4 Hazard ratios for coronary heart disease and ischaemic stroke per 1-SD higher baseline BMI, waist circumference and waist-to-hip ratio levels with adjustment for baseline levels of potential biological mediators..... | 10 |
| eTable 5 Reclassification of 10-year predicted risk of cardiovascular disease after addition of BMI or waist-to-hip ratio or total and HDL-cholesterol measures to a non-lipid-based model.....                                   | 11 |

### eFigures

|                                                                                                                                                                                                                                                                                          |    |
|------------------------------------------------------------------------------------------------------------------------------------------------------------------------------------------------------------------------------------------------------------------------------------------|----|
| eFigure 1 Flow diagram showing steps involved in study selection for the current analysis .....                                                                                                                                                                                          | 12 |
| eFigure 2 Mean adiposity measure levels in each study (part a), according to quantiles of adiposity measures (part b) and within 5-year age bands (part c) .....                                                                                                                         | 13 |
| eFigure 3 Cross-sectional associations of adiposity measures with lipid markers.....                                                                                                                                                                                                     | 14 |
| eFigure 4 Cross-sectional associations of adiposity measures with systolic blood pressure, fasting glucose and some inflammatory markers.....                                                                                                                                            | 15 |
| eFigure 5 Mean risk factors levels across thirds of waist circumference and waist-to-hip ratio by baseline BMI levels.....                                                                                                                                                               | 16 |
| eFigure 6 Mean waist circumference and waist-to-hip ratio levels by diabetes status at baseline, according to deciles of BMI levels .....                                                                                                                                                | 17 |
| eFigure 7 Regression dilution ratios for adiposity measure levels plotted against time since baseline measurement by study .....                                                                                                                                                         | 18 |
| eFigure 8 Hazard ratios for coronary heart disease by clinically defined categories of baseline BMI and waist circumference levels .....                                                                                                                                                 | 19 |
| eFigure 9 Hazard ratios for coronary heart disease and ischaemic stroke across quintiles of baseline BMI, waist circumference and waist-to-hip ratio levels, among men and women .....                                                                                                   | 20 |
| eFigure 10 Hazard ratios for coronary heart disease across thirds of waist circumference and waist-to-hip ratio by baseline levels of triglyceride .....                                                                                                                                 | 21 |
| eFigure 11 Hazard ratios for coronary heart disease per 1-SD higher baseline BMI, waist circumference and waist-to-hip ratio levels, according to several individual and study level characteristics.....                                                                                | 22 |
| eFigure 12 Study-specific hazard ratios for coronary heart disease per 1-SD higher baseline levels of adiposity measures, adjusted for age, sex, and smoking status in the BMI range $\geq 20$ kg/m <sup>2</sup> .....                                                                   | 23 |
| eFigure 13 Funnel plots assessing potential bias due to small studies in the meta-analysis of adiposity measure and coronary heart disease risk.....                                                                                                                                     | 24 |
| eFigure 14 Changes in C-index for cardiovascular disease risk prediction on omission of individual risk factors from a full model containing the Framingham risk score covariates plus BMI, waist circumference or waist-to-hip ratio in participants without diabetes at baseline ..... | 25 |
| eFigure 15 Changes in C-index for cardiovascular disease risk prediction upon addition of BMI, waist circumference or waist-to-hip ratio on top of Framingham risk score covariates, according to different subgroups.....                                                               | 26 |

|                                                                   |    |
|-------------------------------------------------------------------|----|
| <b>eAppendix</b> List of study acronyms and study references..... | 27 |
|-------------------------------------------------------------------|----|

**eTable 1 Descriptive summaries, grouped by study, of individuals with complete information on adiposity measures, age and sex**

| Study design/<br>Study <sup>a</sup> | Total no with<br>weight, height,<br>waist & hip<br>measured | Age (yrs)<br>mean (sd) | Male (%)   | BMI (kg/m <sup>2</sup> )<br>mean (sd) | Waist (cm)<br>mean (sd) | Waist-to-hip<br>ratio<br>mean (sd) | Follow-up (yrs)<br>median<br>(5th & 95th<br>percentiles) | Coronary heart<br>disease<br>(CHD) events | All CHD deaths | Non-fatal MI events | Ischaemic stroke<br>events | Hemorrhagic stroke<br>events | Unclassified stroke<br>events | All cerebrovascular<br>events | All cerebrovascular<br>deaths | Cardiovascular<br>disease events |
|-------------------------------------|-------------------------------------------------------------|------------------------|------------|---------------------------------------|-------------------------|------------------------------------|----------------------------------------------------------|-------------------------------------------|----------------|---------------------|----------------------------|------------------------------|-------------------------------|-------------------------------|-------------------------------|----------------------------------|
| <b>Cohort studies</b>               |                                                             |                        |            |                                       |                         |                                    |                                                          |                                           |                |                     |                            |                              |                               |                               |                               |                                  |
| ARIC <sup>1</sup>                   | 14383                                                       | 54 (6)                 | 6213 (43)  | 28 (5)                                | 97 (14)                 | 0.92 (0.08)                        | 14.0 (4.9 to 15.7)                                       | 865                                       | 198            | 667                 | 455                        | 56                           | 16                            | 564                           | 24                            | 1429                             |
| ATENA <sup>11,c</sup>               | 4741                                                        | 50 (7)                 | 0 (0)      | 27 (4)                                | 85 (10)                 | 0.82 (0.07)                        | 6.7 (5.2 to 8.1)                                         | 18                                        | 1              | 17                  | 1                          | 2                            | 0                             | 4                             | 0                             | 22                               |
| ATTICA <sup>2</sup>                 | 1503                                                        | 51 (11)                | 769 (51)   | 27 (4)                                | 93 (14)                 | 0.88 (0.11)                        | 5.0 (5.0 to 5.0)                                         | 0                                         | 0              | 0                   | 0                          | 0                            | 0                             | 0                             | 0                             | 0                                |
| AUSDIAB <sup>3</sup>                | 9204                                                        | 53 (13)                | 4079 (44)  | 27 (5)                                | 91 (14)                 | 0.87 (0.09)                        | 5.0 (4.8 to 8.5)                                         | 65                                        | 41             | 24                  | 13                         | 7                            | 18                            | 46                            | 28                            | 111                              |
| BRHS <sup>4</sup>                   | 3466                                                        | 68 (5)                 | 3466 (100) | 27 (4)                                | 97 (10)                 | 0.95 (0.06)                        | 5.0 (1.9 to 5.0)                                         | 160                                       | 92             | 68                  | 3                          | 1                            | 104                           | 112                           | 26                            | 272                              |
| BRUN <sup>5</sup>                   | 817                                                         | 58 (11)                | 398 (49)   | 25 (4)                                | 87 (11)                 | 0.89 (0.07)                        | 15.3 (3.9 to 15.5)                                       | 54                                        | 31             | 23                  | 24                         | 15                           | 0                             | 40                            | 18                            | 94                               |
| BWHHS <sup>6</sup>                  | 2779                                                        | 68 (5)                 | 0 (0)      | 27 (5)                                | 85 (12)                 | 0.81 (0.07)                        | 7.3 (3.2 to 8.4)                                         | 89                                        | 13             | 76                  | 0                          | 1                            | 89                            | 90                            | 1                             | 179                              |
| CAPS <sup>7</sup>                   | 1062                                                        | 62 (4)                 | 1062 (100) | 27 (4)                                | 93 (10)                 | 0.93 (0.06)                        | 3.1 (1.8 to 3.3)                                         | 29                                        | 16             | 13                  | 0                          | 0                            | 2                             | 2                             | 2                             | 31                               |
| CHARL <sup>8</sup>                  | 428                                                         | 71 (7)                 | 179 (42)   | 27 (5)                                | 95 (13)                 | 0.94 (0.08)                        | 11.8 (1.3 to 12.9)                                       | 56                                        | 28             | 28                  | 2                          | 4                            | 31                            | 39                            | 14                            | 95                               |
| CHS1 <sup>9,b</sup>                 | 3881                                                        | 72 (5)                 | 1489 (38)  | 26 (5)                                | 93 (13)                 | 0.92 (0.09)                        | 12.1 (1.9 to 12.9)                                       | 593                                       | 213            | 380                 | 368                        | 62                           | 37                            | 467                           | 2                             | 1060                             |
| CHS2 <sup>9,b</sup>                 | 480                                                         | 72 (5)                 | 181 (38)   | 29 (5)                                | 99 (15)                 | 0.94 (0.07)                        | 9.1 (1.7 to 9.5)                                         | 56                                        | 23             | 33                  | 40                         | 5                            | 4                             | 49                            | 0                             | 105                              |
| COPEN <sup>10</sup>                 | 8166                                                        | 58 (15)                | 3502 (43)  | 26 (4)                                | 87 (13)                 | 0.87 (0.10)                        | 13.2 (2.7 to 14.9)                                       | 509                                       | 41             | 468                 | 368                        | 73                           | 121                           | 591                           | 44                            | 1100                             |
| DRECE <sup>12</sup>                 | 497                                                         | 57 (11)                | 222 (45)   | 28 (4)                                | 95 (13)                 | 0.92 (0.11)                        | 1.5 (1.5 to 1.5)                                         | 0                                         | 0              | 0                   | 0                          | 0                            | 0                             | 0                             | 0                             | 0                                |
| EMOFRI <sup>11,c</sup>              | 360                                                         | 55 (6)                 | 176 (49)   | 26 (4)                                | 91 (11)                 | 0.90 (0.07)                        | 6.8 (6.5 to 7.2)                                         | 2                                         | 0              | 2                   | 2                          | 1                            | 0                             | 3                             | 1                             | 5                                |
| EPESENCA <sup>13</sup>              | 1001                                                        | 77 (5)                 | 333 (33)   | 27 (5)                                | 93 (13)                 | 0.88 (0.08)                        | 4.0 (1.4 to 4.6)                                         | 45                                        | 17             | 28                  | 30                         | 5                            | 15                            | 50                            | 4                             | 95                               |
| FINRISK92 <sup>14</sup>             | 5276                                                        | 46 (10)                | 2446 (46)  | 26 (4)                                | 88 (13)                 | 0.86 (0.10)                        | 11.8 (7.1 to 11.9)                                       | 150                                       | 31             | 119                 | 84                         | 36                           | 0                             | 124                           | 7                             | 274                              |
| FINRISK97 <sup>14</sup>             | 6382                                                        | 52 (11)                | 3167 (50)  | 27 (4)                                | 90 (13)                 | 0.87 (0.09)                        | 6.8 (6.0 to 6.9)                                         | 109                                       | 34             | 75                  | 75                         | 19                           | 0                             | 95                            | 5                             | 204                              |
| FRAMOFF <sup>15</sup>               | 2685                                                        | 60 (9)                 | 1183 (44)  | 28 (5)                                | 99 (14)                 | 0.94 (0.08)                        | 5.2 (3.1 to 7.0)                                         | 51                                        | 4              | 47                  | 24                         | 1                            | 0                             | 25                            | 0                             | 76                               |
| GOH <sup>16</sup>                   | 634                                                         | 70 (7)                 | 305 (48)   | 28 (5)                                | 99 (11)                 | 1.03 (0.12)                        | 3.9 (0.3 to 6.9)                                         | 0                                         | 0              | 0                   | 0                          | 0                            | 0                             | 0                             | 0                             | 0                                |
| GOTO13 <sup>17</sup>                | 756                                                         | 54 (0)                 | 756 (100)  | 25 (3)                                | 87 (9)                  | 0.93 (0.05)                        | 23.5 (5.0 to 30.5)                                       | 211                                       | 2              | 209                 | 0                          | 1                            | 115                           | 116                           | 1                             | 327                              |
| GOTO33 <sup>18</sup>                | 729                                                         | 51 (0)                 | 729 (100)  | 26 (3)                                | 95 (9)                  | 0.93 (0.06)                        | 12.8 (5.8 to 13.1)                                       | 27                                        | 13             | 14                  | 0                          | 0                            | 8                             | 8                             | 0                             | 35                               |
| GOTO43 <sup>18</sup>                | 762                                                         | 50 (0)                 | 762 (100)  | 26 (3)                                | 95 (9)                  | 0.99 (0.06)                        | 10.0 (7.9 to 10.7)                                       | 28                                        | 1              | 27                  | 9                          | 1                            | 1                             | 12                            | 1                             | 40                               |
| GOTOW <sup>19</sup>                 | 1401                                                        | 47 (7)                 | 0 (0)      | 24 (4)                                | 74 (9)                  | 0.74 (0.05)                        | 32.2 (8.7 to 32.7)                                       | 147                                       | 54             | 93                  | 0                          | 0                            | 174                           | 174                           | 34                            | 321                              |
| HBS <sup>20</sup>                   | 1268                                                        | 60 (4)                 | 1268 (100) | 26 (3)                                | 97 (9)                  | 0.97 (0.06)                        | 20.5 (6.0 to 20.5)                                       | 85                                        | 85             | 0                   | 0                          | 0                            | 26                            | 26                            | 26                            | 111                              |
| HISAYAMA <sup>21</sup>              | 2515                                                        | 59 (11)                | 1068 (42)  | 23 (3)                                | 81 (9)                  | 0.91 (0.07)                        | 14.0 (3.2 to 14.0)                                       | 77                                        | 10             | 67                  | 146                        | 47                           | 0                             | 216                           | 7                             | 293                              |
| HOORN <sup>22</sup>                 | 2226                                                        | 61 (7)                 | 979 (44)   | 27 (4)                                | 91 (11)                 | 0.89 (0.09)                        | 8.8 (3.7 to 9.9)                                         | 73                                        | 13             | 60                  | 3                          | 4                            | 46                            | 53                            | 11                            | 126                              |
| IKNS <sup>23</sup>                  | 1942                                                        | 59 (10)                | 830 (43)   | 24 (3)                                | 83 (9)                  | 0.90 (0.07)                        | 7.1 (4.1 to 14.6)                                        | 11                                        | 5              | 6                   | 23                         | 8                            | 8                             | 43                            | 4                             | 54                               |
| LASA <sup>24</sup>                  | 1806                                                        | 69 (8)                 | 827 (46)   | 27 (4)                                | 97 (11)                 | 0.94 (0.08)                        | 9.9 (1.8 to 10.4)                                        | 33                                        | 0              | 33                  | 0                          | 0                            | 19                            | 19                            | 0                             | 52                               |
| MATISS83 <sup>11,c</sup>            | 1317                                                        | 61 (9)                 | 614 (47)   | 29 (4)                                | 94 (10)                 | 0.91 (0.09)                        | 8.7 (3.7 to 9.7)                                         | 20                                        | 3              | 17                  | 13                         | 6                            | 17                            | 36                            | 1                             | 56                               |
| MATISS87 <sup>11,c</sup>            | 1077                                                        | 58 (9)                 | 510 (47)   | 29 (4)                                | 94 (11)                 | 0.91 (0.09)                        | 8.5 (5.0 to 9.5)                                         | 12                                        | 5              | 7                   | 4                          | 2                            | 19                            | 26                            | 0                             | 38                               |
| MATISS93 <sup>11,c</sup>            | 1206                                                        | 49 (9)                 | 579 (48)   | 28 (5)                                | 91 (11)                 | 0.91 (0.08)                        | 8.3 (7.0 to 9.3)                                         | 14                                        | 3              | 11                  | 1                          | 2                            | 3                             | 7                             | 0                             | 21                               |
| MESA <sup>25</sup>                  | 6768                                                        | 62 (10)                | 3190 (47)  | 28 (5)                                | 98 (14)                 | 0.93 (0.08)                        | 4.8 (2.5 to 5.2)                                         | 83                                        | 14             | 69                  | 68                         | 13                           | 2                             | 84                            | 1                             | 167                              |

**eTable 1 cont'd Descriptive summaries, grouped by study, of individuals with complete information on adiposity measures, age and sex**

| Study design/<br>Study <sup>a</sup> | Total no with<br>weight, height,<br>waist & hip<br>measured | Age (yrs)<br>mean (sd) | Male (%)          | BMI (kg/m <sup>2</sup> )<br>mean (sd) | Waist (cm)<br>mean (sd) | Waist-to-hip<br>ratio<br>mean (sd) | Follow-up (yrs)<br>median<br>(5th & 95th<br>percentiles) | Coronary heart<br>disease<br>(CHD) events | All CHD deaths | Non-fatal MI<br>events | Ischaemic stroke<br>events | Hemorrhagic<br>stroke<br>events | Unclassified<br>stroke<br>events | All<br>cerebrovascular<br>events | All<br>cerebrovascular<br>deaths | Cardiovascular<br>disease events |
|-------------------------------------|-------------------------------------------------------------|------------------------|-------------------|---------------------------------------|-------------------------|------------------------------------|----------------------------------------------------------|-------------------------------------------|----------------|------------------------|----------------------------|---------------------------------|----------------------------------|----------------------------------|----------------------------------|----------------------------------|
| MOGERAUG2 <sup>26</sup>             | 3934                                                        | 53 (12)                | 1935 (49)         | 27 (4)                                | 90 (12)                 | 0.87 (0.08)                        | 7.9 (2.3 to 8.4)                                         | 102                                       | 41             | 61                     | 1                          | 1                               | 3                                | 7                                | 7                                | 109                              |
| MOGERAUG3 <sup>26</sup>             | 3368                                                        | 55 (10)                | 1663 (49)         | 28 (4)                                | 92 (12)                 | 0.88 (0.09)                        | 3.0 (1.8 to 3.6)                                         | 18                                        | 7              | 11                     | 2                          | 1                               | 2                                | 5                                | 5                                | 23                               |
| MONFRI89 <sup>11,c</sup>            | 1330                                                        | 49 (8)                 | 658 (49)          | 26 (4)                                | 88 (12)                 | 0.87 (0.09)                        | 13.6 (6.6 to 13.7)                                       | 28                                        | 6              | 22                     | 10                         | 5                               | 5                                | 20                               | 3                                | 48                               |
| MONFRI94 <sup>11,c</sup>            | 1291                                                        | 49 (8)                 | 627 (49)          | 26 (4)                                | 90 (12)                 | 0.88 (0.09)                        | 8.5 (7.2 to 8.8)                                         | 11                                        | 0              | 11                     | 5                          | 7                               | 2                                | 16                               | 1                                | 27                               |
| MORGEN <sup>27</sup>                | 17707                                                       | 46 (9)                 | 8046 (45)         | 26 (4)                                | 88 (12)                 | 0.86 (0.09)                        | 10.8 (8.5 to 13.1)                                       | 77                                        | 77             | 0                      | 3                          | 10                              | 4                                | 24                               | 24                               | 101                              |
| MOSWEGOT <sup>28</sup>              | 4132                                                        | 47 (11)                | 1966 (48)         | 25 (4)                                | 85 (12)                 | 0.86 (0.09)                        | 12.9 (7.6 to 18.6)                                       | 141                                       | 39             | 102                    | 65                         | 17                              | 15                               | 116                              | 8                                | 257                              |
| MRCOLD <sup>29</sup>                | 9933                                                        | 80 (4)                 | 3747 (38)         | 26 (4)                                | 90 (12)                 | 0.88 (0.08)                        | 8.7 (1.2 to 11.7)                                        | 1118                                      | 1118           | 0                      | 52                         | 59                              | 504                              | 821                              | 821                              | 1939                             |
| NHANESIII <sup>30</sup>             | 10450                                                       | 53 (16)                | 4859 (46)         | 27 (6)                                | 95 (14)                 | 0.93 (0.09)                        | 8.8 (4.2 to 11.7)                                        | 320                                       | 320            | 0                      | 0                          | 0                               | 113                              | 113                              | 113                              | 433                              |
| NSHS <sup>31</sup>                  | 1608                                                        | 54 (15)                | 765 (48)          | 27 (6)                                | 90 (15)                 | 0.87 (0.10)                        | 9.7 (3.7 to 10.0)                                        | 24                                        | 24             | 0                      | 1                          | 1                               | 48                               | 51                               | 4                                | 75                               |
| OSAKA <sup>32</sup>                 | 717                                                         | 49 (7)                 | 602 (84)          | 23 (3)                                | 84 (8)                  | 0.90 (0.05)                        | 7.7 (3.9 to 16.8)                                        | 4                                         | 2              | 2                      | 3                          | 1                               | 2                                | 6                                | 0                                | 10                               |
| PREVEND <sup>33</sup>               | 7368                                                        | 50 (12)                | 3583 (49)         | 26 (4)                                | 89 (13)                 | 0.88 (0.09)                        | 8.2 (6.7 to 8.9)                                         | 145                                       | 22             | 123                    | 0                          | 17                              | 7                                | 31                               | 7                                | 176                              |
| PRIME <sup>34</sup>                 | 9563                                                        | 55 (3)                 | 9563 (100)        | 27 (3)                                | 95 (10)                 | 0.96 (0.06)                        | 5.2 (5.0 to 7.3)                                         | 145                                       | 17             | 128                    | 33                         | 6                               | 3                                | 42                               | 0                                | 187                              |
| RANCHO <sup>35</sup>                | 1784                                                        | 68 (11)                | 739 (41)          | 25 (4)                                | 85 (12)                 | 0.84 (0.09)                        | 14.2 (2.0 to 18.1)                                       | 222                                       | 3              | 219                    | 0                          | 1                               | 175                              | 185                              | 10                               | 407                              |
| ROTT <sup>36</sup>                  | 4607                                                        | 68 (8)                 | 1752 (38)         | 26 (4)                                | 90 (11)                 | 0.90 (0.09)                        | 11.9 (3.2 to 14.1)                                       | 235                                       | 33             | 202                    | 37                         | 21                              | 58                               | 132                              | 132                              | 367                              |
| SHHEC <sup>37</sup>                 | 3489                                                        | 49 (11)                | 1625 (47)         | 26 (5)                                | 86 (13)                 | 0.85 (0.10)                        | 10.0 (4.8 to 10.0)                                       | 119                                       | 44             | 75                     | 26                         | 9                               | 24                               | 70                               | 5                                | 189                              |
| SHS <sup>38</sup>                   | 4135                                                        | 56 (8)                 | 1615 (39)         | 31 (6)                                | 105 (15)                | 0.95 (0.06)                        | 12.4 (2.1 to 14.3)                                       | 449                                       | 147            | 302                    | 8                          | 10                              | 190                              | 214                              | 44                               | 663                              |
| TARFS <sup>39</sup>                 | 2559                                                        | 49 (12)                | 1270 (50)         | 28 (5)                                | 93 (12)                 | 0.89 (0.09)                        | 9.0 (2.0 to 10.0)                                        | 102                                       | 68             | 34                     | 1                          | 0                               | 27                               | 28                               | 22                               | 130                              |
| TOYAMA <sup>40</sup>                | 4523                                                        | 46 (7)                 | 2907 (64)         | 23 (3)                                | 78 (9)                  | 0.85 (0.07)                        | 12.7 (7.8 to 12.8)                                       | 34                                        | 1              | 33                     | 24                         | 17                              | 0                                | 51                               | 0                                | 85                               |
| TROMSØ <sup>41</sup>                | 1573                                                        | 60 (10)                | 811 (52)          | 26 (4)                                | 91 (11)                 | 0.87 (0.08)                        | 11.1 (2.6 to 11.3)                                       | 146                                       | 18             | 128                    | 78                         | 15                              | 3                                | 102                              | 1                                | 248                              |
| ULSAM <sup>42</sup>                 | 962                                                         | 71 (1)                 | 962 (100)         | 26 (3)                                | 94 (9)                  | 0.94 (0.05)                        | 12.2 (2.3 to 14.9)                                       | 137                                       | 43             | 94                     | 83                         | 15                              | 7                                | 111                              | 4                                | 248                              |
| WHITEII <sup>43</sup>               | 7862                                                        | 49 (6)                 | 5414 (69)         | 25 (4)                                | 85 (11)                 | 0.87 (0.09)                        | 7.6 (3.8 to 8.2)                                         | 167                                       | 22             | 145                    | 1                          | 0                               | 3                                | 6                                | 6                                | 173                              |
| WHS <sup>44</sup>                   | 24138                                                       | 60 (7)                 | 0 (0)             | 27 (5)                                | 89 (14)                 | 0.83 (0.08)                        | 4.7 (3.0 to 5.6)                                         | 115                                       | 4              | 111                    | 117                        | 11                              | 0                                | 135                              | 2                                | 250                              |
| <b>SUBTOTAL<br/>(54 studies)</b>    | <b>218551</b>                                               | <b>58 (9)</b>          | <b>96391 (44)</b> | <b>27 (4.56)</b>                      | <b>91 (12.6)</b>        | <b>0.90 (0.08)</b>                 | <b>7.9 (2.9 to 14.7)</b>                                 | <b>7531</b>                               | <b>3047</b>    | <b>4484</b>            | <b>2306</b>                | <b>596</b>                      | <b>2070</b>                      | <b>5407</b>                      | <b>1481</b>                      | <b>12938</b>                     |
| <b>Nested case-control studies</b>  |                                                             |                        |                   |                                       |                         |                                    |                                                          |                                           |                |                        |                            |                                 |                                  |                                  |                                  |                                  |
| EPICNOR <sup>45</sup>               | 1417                                                        | 66 (8)                 | 960 (68)          | 27 (4)                                | 93 (11)                 | 0.90 (0.08)                        | 7.1 (2.2 to 9.3)                                         | 479                                       | 224            | 255                    | -                          | -                               | -                                | -                                | -                                | -                                |
| HPFS <sup>46</sup>                  | 394                                                         | 66 (8)                 | 394 (100)         | 26 (4)                                | 99 (10)                 | 0.96 (0.06)                        | 4.0 (0.8 to 4.0)                                         | 129                                       | 21             | 108                    | -                          | -                               | -                                | -                                | -                                | -                                |
| NHS <sup>47</sup>                   | 372                                                         | 58 (6)                 | 0 (0)             | 25 (4)                                | 81 (11)                 | 0.79 (0.07)                        | 12.0 (5.2 to 12.0)                                       | 151                                       | 16             | 135                    | -                          | -                               | -                                | -                                | -                                | -                                |
| WHIHBAPS <sup>48</sup>              | 1200                                                        | 68 (6)                 | 0 (0)             | 27 (6)                                | 86 (13)                 | 0.82 (0.09)                        | 6.8 (1.2 to 9.3)                                         | -                                         | -              | -                      | 600                        | -                               | -                                | -                                | -                                | -                                |
| <b>SUBTOTAL<br/>(4 studies)</b>     | <b>3383</b>                                                 | <b>64 (7)</b>          | <b>1354 (40)</b>  | <b>26 (4.46)</b>                      | <b>90 (11.8)</b>        | <b>0.87 (0.08)</b>                 | <b>6.9 (1.5 to 12.0)</b>                                 | <b>759</b>                                | <b>261</b>     | <b>498</b>             | <b>600</b>                 | <b>-</b>                        | <b>-</b>                         | <b>-</b>                         | <b>-</b>                         | <b>-</b>                         |
| <b>TOTAL<br/>(58 studies)</b>       | <b>221934</b>                                               | <b>58 (9)</b>          | <b>97745 (44)</b> | <b>27 (4.56)</b>                      | <b>91 (12.6)</b>        | <b>0.90 (0.083)</b>                | <b>7.9 (2.9 to 14.7)</b>                                 | <b>8290</b>                               | <b>3308</b>    | <b>4982</b>            | <b>2906</b>                | <b>596</b>                      | <b>2070</b>                      | <b>5407</b>                      | <b>1481</b>                      | <b>12938</b>                     |

<sup>a</sup>eAppendix lists study acronyms and study references. <sup>b</sup>CHS included an original cohort (here termed CHS1) and a supplemental African-American cohort (here termed CHS2), which were analysed separately. <sup>c</sup>Progetto CUORE was analysed as 7 different studies (ie, ATENA, EMOFRI, MATISS83, MATISS87, MATISS93, MONFRI89 and MONFRI94).

**eTable 2 Description of methods used to assess adiposity measures in the contributing studies**

| Study abbreviation <sup>a</sup> | Country   | Year(s) of baseline survey | Measurement of height & weight | Measurement of waist & hip | Assessment of height & weight                                                          | Assessment of waist circumference                           | Assessment of hip circumference                              |
|---------------------------------|-----------|----------------------------|--------------------------------|----------------------------|----------------------------------------------------------------------------------------|-------------------------------------------------------------|--------------------------------------------------------------|
| ARIC                            | USA       | 1987-1989                  | Assessed                       | Assessed                   | participant wearing a scrub suit and no shoes                                          | umbilical level                                             | around the maximum buttocks                                  |
| ATENA <sup>c</sup>              | Italy     | 1993-1996                  | Assessed                       | Assessed                   | light clothing and no shoes                                                            | midway between lower rib margin and the iliac crest         | maximum circumference over the buttocks                      |
| ATTICA                          | Greece    | 2001                       | Assessed                       | Assessed                   | light undergarments and no shoes                                                       | midway between lower rib margin and the iliac crest         | around the maximum buttocks                                  |
| AUSDIAB                         | Australia | 1999-2000                  | Assessed                       | Assessed                   | light clothing and no shoes                                                            | midway between lower rib margin and the iliac crest         | maximum circumference over the buttocks                      |
| BRHS                            | UK        | 1998-2000                  | Assessed                       | Assessed                   | light undergarments and no shoes                                                       | midway between lower rib margin and the iliac crest         | largest circumference below the waist                        |
| BRUN                            | Italy     | 1990                       | Assessed                       | Assessed                   | measured after an overnight fast, subjects wearing only undergarments.                 | umbilical level                                             | at greater trochanters                                       |
| BWHHS                           | UK        | 1999-2001                  | Assessed                       | Assessed                   | light clothing and no shoes                                                            | midway between lower rib margin and the iliac crest         | largest circumference below the waist                        |
| CAPS                            | UK        | 1990-1993                  | Assessed                       | Assessed                   | NA                                                                                     | narrowest point between the costal line and the iliac crest | at greater trochanters                                       |
| CHARL                           | USA       | 1987-1989                  | Assessed                       | Assessed                   | light clothing and no shoes                                                            | umbilical level                                             | at greater trochanters                                       |
| CHS1 <sup>b</sup>               | USA       | 1989-1990                  | Assessed                       | Assessed                   | NA                                                                                     | umbilical level                                             | maximum hip circumference                                    |
| CHS2 <sup>b</sup>               | USA       | 1992-1993                  | Assessed                       | Assessed                   | NA                                                                                     | umbilical level                                             | maximum hip circumference                                    |
| COPEN                           | Denmark   | 1992-1994                  | Assessed                       | Assessed                   | light clothing or underwear and no shoes                                               | midway between lower rib margin and the iliac crest         | maximum circumference over the buttocks                      |
| DRECE                           | Spain     | 2006                       | Assessed                       | Assessed                   | NA                                                                                     | NA                                                          | NA                                                           |
| EMOFRI <sup>c</sup>             | Italy     | 1995-1996                  | Assessed                       | Assessed                   | light clothing and no shoes                                                            | midway between lower rib margin and the iliac crest         | maximum circumference over the buttocks                      |
| EPESENCA                        | USA       | 1992-1993                  | Self-reported                  | Assessed                   | NA                                                                                     | umbilical level                                             | NA                                                           |
| EPICNOR                         | UK        | 1993-1997                  | Assessed                       | Assessed                   | no shoes                                                                               | smallest circumference between the ribs and iliac crest     | maximum circumference between the iliac crest and the crotch |
| FINRISK92                       | Finland   | 1992                       | Assessed                       | Assessed                   | light clothing and no shoes                                                            | midway between lower rib margin and the iliac crest         | maximum circumference over the buttocks                      |
| FINRISK97                       | Finland   | 1997                       | Assessed                       | Assessed                   | light clothing and no shoes                                                            | midway between lower rib margin and the iliac crest         | maximum circumference over the buttocks                      |
| FRAMOFF                         | USA       | 1998-2000                  | Assessed                       | Assessed                   | light clothing and no shoes                                                            | umbilical level                                             | NA                                                           |
| GOH                             | Israel    | 1999-2005                  | Assessed                       | Assessed                   | light clothing and no shoes                                                            | one finger width above superior iliac crest                 | At groin level                                               |
| GOTO13                          | Sweden    | 1967                       | Assessed                       | Assessed                   | wearing underpants                                                                     | umbilical level                                             | at the level of the anterior iliac crest                     |
| GOTO33                          | Sweden    | 1983-1984                  | Assessed                       | Assessed                   | after an overnight fast, indoor clothing, and 0.8 kg deducted from the recorded weight | umbilical level                                             | at the level of the anterior iliac crest                     |
| GOTO43                          | Sweden    | 1993-1994                  | Assessed                       | Assessed                   | after an overnight fast, indoor clothing, and 0.8 kg deducted from the recorded weight | umbilical level                                             | at the level of the anterior iliac crest                     |
| GOTOW                           | Sweden    | 1968-1969                  | Assessed                       | Assessed                   | no shoes                                                                               | midway between lower rib margin and the iliac crest         | widest point between hip and buttock                         |
| HBS                             | Finland   | 1986                       | Assessed                       | Assessed                   | without shoes and shirt                                                                | umbilical level                                             | at the level of the anterior iliac crest                     |

**eTable 2 cont'd Description of methods used to assess adiposity measures in the contributing studies**

| Study abbreviation <sup>a</sup> | Country           | Year(s) of baseline survey | Measurement of height & weight | Measurement of waist & hip | Assessment of height & weight                             | Assessment of waist circumference                                            | Assessment of hip circumference                                                            |
|---------------------------------|-------------------|----------------------------|--------------------------------|----------------------------|-----------------------------------------------------------|------------------------------------------------------------------------------|--------------------------------------------------------------------------------------------|
| HISAYAMA                        | Japan             | 1988                       | Assessed                       | Assessed                   | light clothing and no shoes                               | umbilical level                                                              | Around the buttocks, 4cm below the anterior superior iliac spine                           |
| HOORN                           | Netherlands       | 1990-1991                  | Assessed                       | Assessed                   | light clothing and no shoes                               | midway between lower rib margin and the iliac crest                          | widest level over the greater trochanters                                                  |
| HPFS                            | USA               | 1996                       | Self-reported                  | Self-reported              | NA                                                        | umbilical level                                                              | largest circumference between the waist and thighs                                         |
| IKNS                            | Japan             | 1990-1993                  | Assessed                       | Assessed                   | light clothing and no shoes                               | umbilical level                                                              | maximum circumference over the buttocks                                                    |
| LASA                            | Netherlands       | 1992-1993                  | Assessed                       | Assessed                   | light clothing                                            | midway between lower rib margin and the iliac crest                          | widest level over the greater trochanters                                                  |
| MATISS83 <sup>c</sup>           | Italy             | 1993-1996                  | Assessed                       | Assessed                   | light clothing and no shoes                               | midway between lower rib margin and the iliac crest                          | maximum circumference over the buttocks                                                    |
| MATISS87 <sup>c</sup>           | Italy             | 1993-1996                  | Assessed                       | Assessed                   | light clothing and no shoes                               | midway between lower rib margin and the iliac crest                          | maximum circumference over the buttocks                                                    |
| MATISS93 <sup>c</sup>           | Italy             | 1993-1995                  | Assessed                       | Assessed                   | light clothing and no shoes                               | midway between lower rib margin and the iliac crest                          | maximum circumference over the buttocks                                                    |
| MESA                            | USA               | 2001                       | Assessed                       | Assessed                   | light clothing and no shoes                               | umbilical level                                                              | NA                                                                                         |
| MOGERAUG2                       | Germany           | 1989-1990                  | Assessed                       | Assessed                   | light clothing and no shoes                               | midway between lower rib margin and the iliac crest                          | maximum circumference over the buttocks                                                    |
| MOGERAUG3                       | Germany           | 1994-1995                  | Assessed                       | Assessed                   | light clothing and no shoes                               | midway between lower rib margin and the iliac crest                          | maximum circumference over the buttocks                                                    |
| MONFRI89 <sup>c</sup>           | Italy             | 1989                       | Assessed                       | Assessed                   | light clothing and no shoes                               | midway between lower rib margin and the iliac crest                          | maximum circumference over the buttocks                                                    |
| MONFRI94 <sup>c</sup>           | Italy             | 1994                       | Assessed                       | Assessed                   | light clothing and no shoes                               | midway between lower rib margin and the iliac crest                          | maximum circumference over the buttocks                                                    |
| MORGEN                          | Netherlands       | 1993-1997                  | Assessed                       | Assessed                   | indoor clothing and no shoes                              | midway between lower rib margin and the iliac crest                          | at the level of the greater trochanters                                                    |
| MOSWEGOT                        | Sweden            | 1985-1995                  | Assessed                       | Assessed                   | light clothing and no shoes after at least 4 h of fasting | midway between lower rib margin and the iliac crest                          | maximum circumference over the buttocks                                                    |
| MRCOLD                          | UK                | 1995-1998                  | Assessed                       | Assessed                   | light undergarments and no shoes                          | midway between lower rib margin and the iliac crest (Duplicate measurements) | maximum circumference over the buttocks and below the iliac crest (Duplicate measurements) |
| NHANESIII                       | USA               | 1988-1993                  | Assessed                       | Assessed                   | paper shirt and pants and foam slippers                   | at level with the iliac crest at the end of a normal expiration              | maximum circumference over the buttocks                                                    |
| NHS                             | USA               | 1986                       | Self-reported                  | Self-reported              | NA                                                        | umbilical level                                                              | largest circumference around hips (including buttocks)                                     |
| NSHS                            | Canada            | 1995                       | Assessed                       | Assessed                   | light clothing and no shoes                               | at the point of noticeable waist narrowing                                   | at the level of the symphysis pubis and the greatest gluteal protuberance                  |
| OSAKA                           | Japan             | 1992-1997                  | Assessed                       | Assessed                   | light clothing and no shoes                               | umbilical level                                                              | maximum circumference over the buttocks                                                    |
| PREVEND                         | Netherlands       | 1997-1998                  | Assessed                       | Assessed                   | light clothing and no shoes                               | midway between lower rib margin and the iliac crest                          | maximum circumference over the buttocks                                                    |
| PRIME                           | France/N. Ireland | 1991-1993                  | Assessed                       | Assessed                   | light clothing and no shoes                               | midway between lower rib margin and the iliac crest                          | above the buttocks                                                                         |

**eTable 2 cont'd Description of methods used to assess adiposity measures in the contributing studies**

| Study abbreviation <sup>a</sup> | Country     | Year(s) of baseline survey | Measurement of height & weight | Measurement of waist & hip | Assessment of height & weight     | Assessment of waist circumference                                    | Assessment of hip circumference                           |
|---------------------------------|-------------|----------------------------|--------------------------------|----------------------------|-----------------------------------|----------------------------------------------------------------------|-----------------------------------------------------------|
| RANCHO                          | USA         | 1984-1986                  | Assessed                       | Assessed                   | indoor clothing and no shoes      | at the bending point (the natural indentation when bending sideways) | largest girth below the waist                             |
| ROTT                            | Netherlands | 1990-1993                  | Assessed                       | Assessed                   | no shoes and heavy outer garments | midway between lower rib margin and the iliac crest                  | maximum circumference over the buttocks                   |
| SHHEC                           | UK          | 1989-1995                  | Assessed                       | Assessed                   | NA                                | NA                                                                   | NA                                                        |
| SHS                             | USA         | 1989-1991                  | Assessed                       | Assessed                   | light clothing and no shoes       | umbilical level                                                      | at the maximum protrusion of gluteal muscles              |
| TARFS                           | Turkey      | 1998                       | Assessed                       | Assessed                   | light clothing and no shoes       | midway between lower rib margin and the iliac crest                  | at the level of the greater trochanters                   |
| TOYAMA                          | Japan       | 1996                       | Assessed                       | Assessed                   | light clothing and no shoes       | midway between lower rib margin and the iliac crest                  | maximum circumference over the buttocks                   |
| TROMSØ                          | Norway      | 1994-1995                  | Assessed                       | Assessed                   | light clothing and no shoes       | umbilical level                                                      | at the widest point at the hips                           |
| ULSAM                           | Sweden      | 1991-1994                  | Assessed                       | Assessed                   | NA                                | midway between lower rib margin and the iliac crest                  | measured over the widest part                             |
| WHIHABPS                        | USA         | 1994                       | Assessed                       | Assessed                   | light clothing and no shoes       | at the natural waist or narrowest part of the torso                  | maximum circumference over the buttocks                   |
| WHITEII                         | UK          | 1991-1993                  | Assessed                       | Assessed                   | NA                                | midway between lower rib margin and the iliac crest                  | at the level of the greater trochanters                   |
| WHS                             | USA         | 1999-2001                  | Self-reported                  | Self-reported              | NA                                | umbilical level                                                      | maximum circumference between the umbilicus and the thigh |

<sup>a</sup>eAppendix lists study acronyms and study references.

<sup>b</sup>CHS included an original cohort (here termed CHS1) and a supplemental African-American cohort (here termed CHS2), which were analysed separately.

<sup>c</sup>Progetto CUORE was analysed as 7 different studies (ie, ATENA, EMOFRI, MATISS83, MATISS87, MATISS93, MONFRI89 and MONFRI94).

Abbreviations: Assessed, anthropometric marker was assessed by a trained person; Self-reported, anthropometric marker was measured by the subject itself; NA, information not available.

**eTable 3 Summary of data available and associations with adiposity measures**

**A**

|                                                           | Summary of available data on BMI, waist & hip circumference |                    |                | Difference (95% CI) in row variables per 1-SD higher level of adiposity measures <sup>‡</sup> |                          |                        |
|-----------------------------------------------------------|-------------------------------------------------------------|--------------------|----------------|-----------------------------------------------------------------------------------------------|--------------------------|------------------------|
|                                                           | No of studies                                               | No of participants | Mean (SD) or % | BMI (kg/m <sup>2</sup> )                                                                      | Waist circumference (cm) | Waist-to-hip ratio     |
| <b>Adiposity measures</b>                                 |                                                             |                    |                |                                                                                               |                          |                        |
| BMI (kg/m <sup>2</sup> )                                  | 58                                                          | 221934             | 27 (4.56)      | -                                                                                             | 4.06 (3.95 to 4.17)      | 2.21 (2.05 to 2.38)    |
| Waist circumference (cm)                                  | 58                                                          | 221934             | 91 (12.6)      | 10.05 (9.85 to 10.26)                                                                         | -                        | 9.50 (9.08 to 9.91)    |
| Waist-to-hip ratio                                        | 58                                                          | 221934             | 0.90 (0.083)   | 0.03 (0.03 to 0.03)                                                                           | 0.05 (0.05 to 0.06)      | -                      |
| <b>BP and glucose</b>                                     |                                                             |                    |                |                                                                                               |                          |                        |
| Systolic BP (mmHg)                                        | 53                                                          | 191170             | 135 (20)       | 4.40 (4.00 to 4.81)                                                                           | 4.41 (4.02 to 4.80)      | 3.37 (3.08 to 3.67)    |
| Diastolic BP (mmHg)                                       | 53                                                          | 191112             | 80 (11)        | 2.95 (2.60 to 3.31)                                                                           | 2.93 (2.59 to 3.27)      | 2.09 (1.83 to 2.35)    |
| Fasting glucose (mmol/l)                                  | 34                                                          | 85330              | 5.6 (1.8)      | 0.29 (0.26 to 0.32)                                                                           | 0.33 (0.28 to 0.37)      | 0.29 (0.22 to 0.36)    |
| <b>Lipid markers</b>                                      |                                                             |                    |                |                                                                                               |                          |                        |
| Total cholesterol (mmol/l)                                | 53                                                          | 179735             | 5.8 (1.1)      | 0.09 (0.06 to 0.11)                                                                           | 0.09 (0.07 to 0.12)      | 0.12 (0.10 to 0.14)    |
| Non-HDL-cholesterol (mmol/l)                              | 50                                                          | 174024             | 4.40 (1.12)    | 0.19 (0.16 to 0.22)                                                                           | 0.21 (0.18 to 0.24)      | 0.22 (0.19 to 0.25)    |
| HDL-cholesterol (mmol/l)                                  | 50                                                          | 174095             | 1.40 (0.40)    | -0.11 (-0.11 to -0.10)                                                                        | -0.12 (-0.12 to -0.11)   | -0.10 (-0.11 to -0.09) |
| Log <sub>e</sub> triglyceride (mmol/l)                    | 47                                                          | 146974             | 0.31 (0.53)    | 0.16 (0.14 to 0.18)                                                                           | 0.18 (0.17 to 0.20)      | 0.18 (0.16 to 0.19)    |
| Apo AI (g/l)                                              | 17                                                          | 63156              | 1.53 (0.30)    | -0.05 (-0.06 to -0.04)                                                                        | -0.05 (-0.06 to -0.04)   | -0.04 (-0.06 to -0.03) |
| Apo B (g/l)                                               | 16                                                          | 62347              | 1.13 (0.30)    | 0.05 (0.03 to 0.06)                                                                           | 0.05 (0.04 to 0.07)      | 0.05 (0.03 to 0.07)    |
| Log <sub>e</sub> Lp(a) (mg/dl)                            | 15                                                          | 55520              | 2.45 (1.17)    | 0.01 (-0.02 to 0.04)                                                                          | -0.01 (-0.04 to 0.01)    | -0.04 (-0.07 to -0.01) |
| <b>Inflammatory markers</b>                               |                                                             |                    |                |                                                                                               |                          |                        |
| Fibrinogen (μmol/l)                                       | 28                                                          | 97608              | 8.7 (2.1)      | 0.33 (0.27 to 0.39)                                                                           | 0.35 (0.28 to 0.41)      | 0.30 (0.24 to 0.37)    |
| Log <sub>e</sub> CRP (mg/l)                               | 30                                                          | 67483              | 0.66 (1.08)    | 0.33 (0.29 to 0.37)                                                                           | 0.36 (0.32 to 0.40)      | 0.31 (0.26 to 0.35)    |
| Albumin (g/l)                                             | 19                                                          | 64230              | 43 (3)         | -0.11 (-0.25 to 0.03)                                                                         | -0.10 (-0.22 to 0.03)    | 0.02 (-0.06 to 0.10)   |
| Log <sub>e</sub> leukocyte count (x10 <sup>9</sup> per l) | 18                                                          | 61522              | 1.82 (0.28)    | 0.03 (0.02 to 0.03)                                                                           | 0.03 (0.03 to 0.04)      | 0.04 (0.03 to 0.05)    |
| Log <sub>e</sub> Interleukin 6 (ng/l)                     | 8                                                           | 24290              | 0.57 (0.64)    | 0.15 (0.11 to 0.19)                                                                           | 0.16 (0.12 to 0.21)      | 0.14 (0.10 to 0.19)    |

<sup>‡</sup>Change in row variable (adiposity measure or potential mediating risk factor) per 1-SD higher levels of adiposity measure, adjusted for age and sex, pooled across studies using random effects meta-analysis.



**eTable 3 cont'd Summary of data available and associations with adiposity measures**

**B**

|                              | No of studies | No of participants | Mean (SD) or % | Difference (95% CI) in Z-score of adiposity measures per 1-SD higher level of row variable or compared to reference category <sup>‡</sup> |                          |                        |
|------------------------------|---------------|--------------------|----------------|-------------------------------------------------------------------------------------------------------------------------------------------|--------------------------|------------------------|
|                              |               |                    |                | BMI (kg/m <sup>2</sup> )                                                                                                                  | Waist circumference (cm) | Waist-to-hip ratio     |
| Age at survey (yrs)          | 58            | 221934             | 58 (9)         | 0.02 (-0.02 to 0.06)                                                                                                                      | 0.11 (0.08 to 0.14)      | 0.15 (0.12 to 0.17)    |
| <b>Categorical variables</b> |               |                    |                |                                                                                                                                           |                          |                        |
| Sex                          | 58            | 221934             |                |                                                                                                                                           |                          |                        |
| Female                       |               | 124189             | 56%            | 0.04 (-0.04 to 0.11)                                                                                                                      | -0.63 (-0.74 to -0.52)   | -1.15 (-1.27 to -1.03) |
| Male                         |               | 97745              | 44%            | Ref                                                                                                                                       | Ref                      | Ref                    |
| Ethnicity                    | 44            | 145882             |                |                                                                                                                                           |                          |                        |
| Non-white                    |               | 28956              | 20%            | 0.24 (0.13 to 0.35)                                                                                                                       | 0.10 (0.00 to 0.20)      | 0.10 (0.01 to 0.18)    |
| White                        |               | 116926             | 80%            | Ref                                                                                                                                       | Ref                      | Ref                    |
| Smoking status               | 58            | 219092             |                |                                                                                                                                           |                          |                        |
| Current                      |               | 52261              | 24%            | -0.21 (-0.24 to -0.18)                                                                                                                    | -0.12 (-0.15 to -0.09)   | 0.05 (0.02 to 0.07)    |
| Not current                  |               | 166831             | 76%            | Ref                                                                                                                                       | Ref                      | Ref                    |
| Alcohol status               | 47            | 195186             |                |                                                                                                                                           |                          |                        |
| Current                      |               | 110199             | 56%            | -0.13 (-0.17 to -0.09)                                                                                                                    | -0.08 (-0.12 to -0.04)   | -0.02 (-0.05 to 0.01)  |
| Not current                  |               | 84987              | 44%            | Ref                                                                                                                                       | Ref                      | Ref                    |
| History of diabetes          | 56            | 203849             |                |                                                                                                                                           |                          |                        |
| Yes                          |               | 13899              | 7%             | 0.43 (0.37 to 0.49)                                                                                                                       | 0.46 (0.40 to 0.52)      | 0.36 (0.32 to 0.41)    |
| No                           |               | 189950             | 93%            | Ref                                                                                                                                       | Ref                      | Ref                    |
| Level of education reached   | 33            | 125162             |                |                                                                                                                                           |                          |                        |
| Tertiary                     |               | 34013              | 27%            | -0.29 (-0.34 to -0.23)                                                                                                                    | -0.24 (-0.29 to -0.19)   | -0.26 (-0.30 to -0.21) |
| Secondary                    |               | 64186              | 51%            | -0.17 (-0.21 to -0.13)                                                                                                                    | -0.14 (-0.18 to -0.11)   | -0.13 (-0.16 to -0.10) |
| Primary                      |               | 26963              | 22%            | Ref                                                                                                                                       | Ref                      | Ref                    |

<sup>‡</sup>Difference in mean Z-score of adiposity measure levels per 1-SD higher levels of the row variable or compared to reference category, adjusted for age and sex, pooled across studies using random effects meta-analysis. To obtain the original scale of each adiposity measure, Z-scores have to be multiplied by the standard deviation of corresponding adiposity measure.

**eTable 4 Hazard ratios for coronary heart disease and ischaemic stroke per 1-SD higher baseline BMI, waist circumference and waist-to-hip ratio levels with adjustment for baseline levels of potential mediating risk factors**

| Outcome / adjusted variables <sup>†</sup>      | HR (95% CI)         |                     |                     |
|------------------------------------------------|---------------------|---------------------|---------------------|
|                                                | Body-mass index     | Waist circumference | Waist-to-hip ratio  |
| <b>Coronary heart disease</b>                  |                     |                     |                     |
| (34 studies, 114083 participants & 4800 cases) |                     |                     |                     |
| Adjusted for age, sex and smoking              | 1.28 (1.21 to 1.36) | 1.30 (1.23 to 1.37) | 1.30 (1.22 to 1.38) |
| plus intermediate risk factors                 | 1.10 (1.05 to 1.16) | 1.11 (1.06 to 1.17) | 1.14 (1.10 to 1.18) |
| plus log <sub>e</sub> triglyceride             | 1.10 (1.05 to 1.15) | 1.11 (1.06 to 1.16) | 1.15 (1.11 to 1.19) |
| (21 studies, 50492 participants & 2854 cases)  |                     |                     |                     |
| Adjusted for age, sex and smoking              | 1.26 (1.17 to 1.35) | 1.28 (1.19 to 1.38) | 1.28 (1.19 to 1.37) |
| plus possible intermediate risk factors        | 1.10 (1.02 to 1.18) | 1.11 (1.03 to 1.20) | 1.12 (1.07 to 1.17) |
| plus log <sub>e</sub> C-reactive protein       | 1.04 (0.97 to 1.12) | 1.05 (0.98 to 1.13) | 1.08 (1.04 to 1.13) |
| (21 studies, 82557 participants & 3568 cases)  |                     |                     |                     |
| Adjusted for age, sex and smoking              | 1.25 (1.16 to 1.34) | 1.26 (1.17 to 1.35) | 1.27 (1.18 to 1.37) |
| plus intermediate risk factors                 | 1.08 (1.01 to 1.14) | 1.08 (1.02 to 1.15) | 1.13 (1.09 to 1.18) |
| plus fibrinogen                                | 1.06 (1.00 to 1.12) | 1.06 (1.00 to 1.12) | 1.13 (1.09 to 1.18) |
| <b>Ischaemic stroke</b>                        |                     |                     |                     |
| (20 studies, 81017 participants & 2395 cases)  |                     |                     |                     |
| Adjusted for age, sex and smoking              | 1.19 (1.11 to 1.28) | 1.25 (1.18 to 1.33) | 1.25 (1.18 to 1.33) |
| plus intermediate risk factors                 | 1.06 (0.99 to 1.13) | 1.11 (1.05 to 1.17) | 1.15 (1.09 to 1.21) |
| plus log <sub>e</sub> triglyceride             | 1.06 (0.99 to 1.13) | 1.11 (1.05 to 1.18) | 1.15 (1.09 to 1.21) |
| (12 studies, 30758 participants & 1656 cases)  |                     |                     |                     |
| Adjusted for age, sex and smoking              | 1.16 (1.08 to 1.25) | 1.21 (1.13 to 1.29) | 1.22 (1.13 to 1.31) |
| plus intermediate risk factors                 | 1.07 (0.98 to 1.16) | 1.11 (1.03 to 1.20) | 1.15 (1.06 to 1.25) |
| plus log <sub>e</sub> C-reactive protein       | 1.02 (0.95 to 1.10) | 1.11 (1.03 to 1.20) | 1.13 (1.04 to 1.23) |
| (15 studies, 59328 participants & 1856 cases)  |                     |                     |                     |
| Adjusted for age, sex and smoking              | 1.21 (1.12 to 1.31) | 1.26 (1.18 to 1.34) | 1.28 (1.17 to 1.39) |
| plus intermediate risk factors                 | 1.08 (1.00 to 1.16) | 1.12 (1.05 to 1.18) | 1.17 (1.08 to 1.25) |
| plus fibrinogen                                | 1.06 (0.99 to 1.13) | 1.11 (1.05 to 1.17) | 1.16 (1.08 to 1.24) |

<sup>†</sup>Intermediate risk factors were systolic blood pressure, history of diabetes, and total and HDL cholesterol.

Hazard ratios (HRs) are presented per 4.56 kg/m<sup>2</sup> higher BMI, 12.6 cm higher waist circumference and 0.083 higher waist-to-hip ratio (ie, 1-SD higher baseline values). Analyses are restricted to participants with BMI values of 20 kg/m<sup>2</sup> or higher and complete information on age, sex, smoking status, and intermediate risk factors plus triglyceride, CRP or fibrinogen in turn.

**eTable 5 Reclassification of 10-year predicted risk of cardiovascular disease after addition of BMI or waist-to-hip ratio or total and HDL-cholesterol measures to a non-lipid-based model**

|                                                                   | Body-mass index         | Waist-to-hip ratio      | Total cholesterol & HDL-C |
|-------------------------------------------------------------------|-------------------------|-------------------------|---------------------------|
| <b>Reclassification</b> (20 studies, 4777 cases, 43944 non-cases) |                         |                         |                           |
| Participants who developed CVD at 10 years                        |                         |                         |                           |
| Appropriately reclassified                                        | 159 (3.33%)             | 211 (4.42%)             | 509 (10.66%)              |
| Inappropriately reclassified                                      | 137 (2.87%)             | 189 (3.96%)             | 381 (7.98%)               |
| No change                                                         | 4481 (93.80%)           | 4377 (91.63%)           | 3887 (81.37%)             |
| Participants who were event free at 10 years                      |                         |                         |                           |
| Appropriately reclassified                                        | 1033 (2.35%)            | 1572 (3.58%)            | 3095 (7.04)               |
| Inappropriately reclassified                                      | 1161 (2.64%)            | 1544 (3.51%)            | 3027 (6.89%)              |
| No change                                                         | 41750 (95.01%)          | 40828 (92.91%)          | 37822 (86.07%)            |
| NRI (95% CI)                                                      | 0.17% (-0.57%, 0.91%)   | 0.52% (-0.33%, 1.38%)   | 2.83% (1.56%, 4.11%)      |
| p-value                                                           | 0.652                   | 0.231                   | <0.0001                   |
| IDI (95% CI)                                                      | 0.0005 (0.0001, 0.0010) | 0.0019 (0.0012, 0.0026) | 0.0059 (0.0046, 0.0072)   |
| p-value                                                           | 0.022                   | <0.001                  | <0.0001                   |

Non-lipid-based variables were age, smoking status, systolic blood pressure and history of diabetes. Model was stratified by sex. Analyses are restricted to cohorts and participants with BMI of 20 kg/m<sup>2</sup> or higher. Cohort studies recording both fatal and non-fatal cardiovascular outcomes and more than 10 years of follow-up contributed to reclassification analyses. NRI, Net Reclassification Improvement; IDI, Integrated Discrimination Improvement.

**eFigure 1 Flow diagram showing steps involved in study selection for the current analysis**

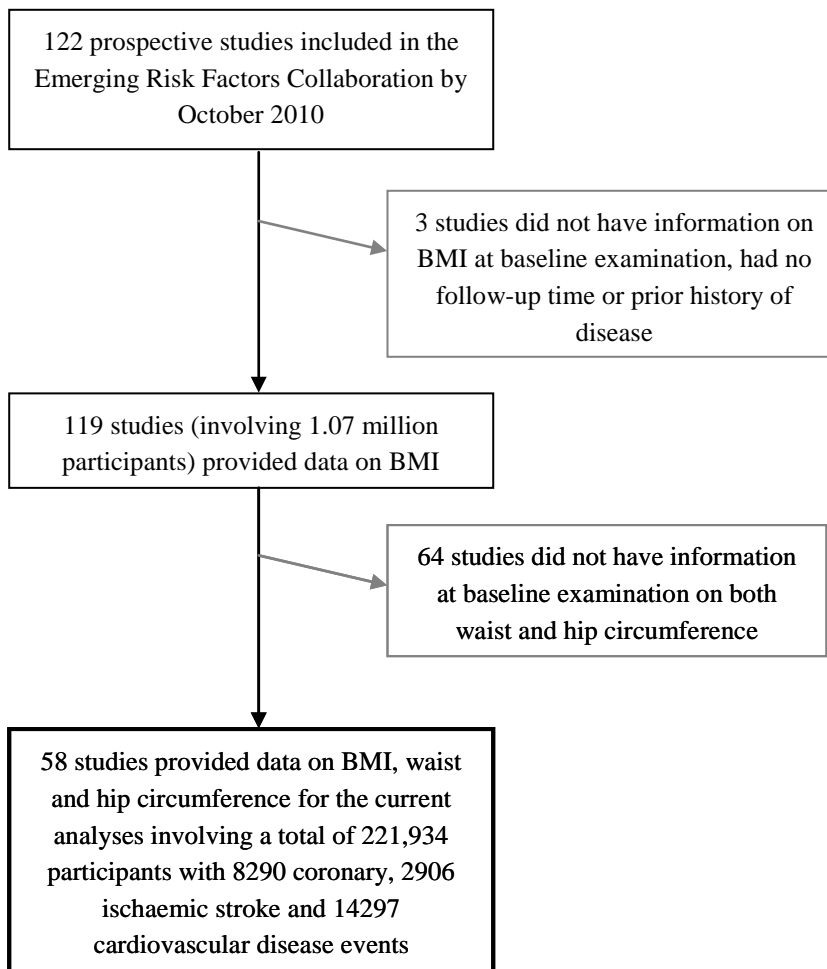

To be eligible for inclusion in the Emerging Risk Factors Collaboration (ERFC), prospective studies (reported variously as observational cohort studies, trials, or analyses of nested case-control or case-cohort subsets) had: (1) data available from baseline measurements of at least one of the relevant markers assessed; (2) at least 1 year of follow-up; (3) participants not selected on the basis of having previous cardiovascular diseases; and (4) information on cause-specific mortality and/or major cardiovascular morbidity collected during follow-up. Studies were included if they were known to have recorded at least 20 000 person years at risk. Most eligible studies were identified in previously published meta-analyses, with additional studies identified through updated computer-assisted literature searches of databases, scanning of reference lists, hand-searching of relevant journals and correspondence with authors of relevant reports. Further details of the ERFC (including search strategies, contributing studies, data provision and management, and other characteristics) have been reported previously (*Eur J Epidemiol.* 2007;22:839-869).

eFigure 2 Mean adiposity measure levels in each study (part a), according to quantiles of adiposity measures (part b) and within 5-year age bands (part c)

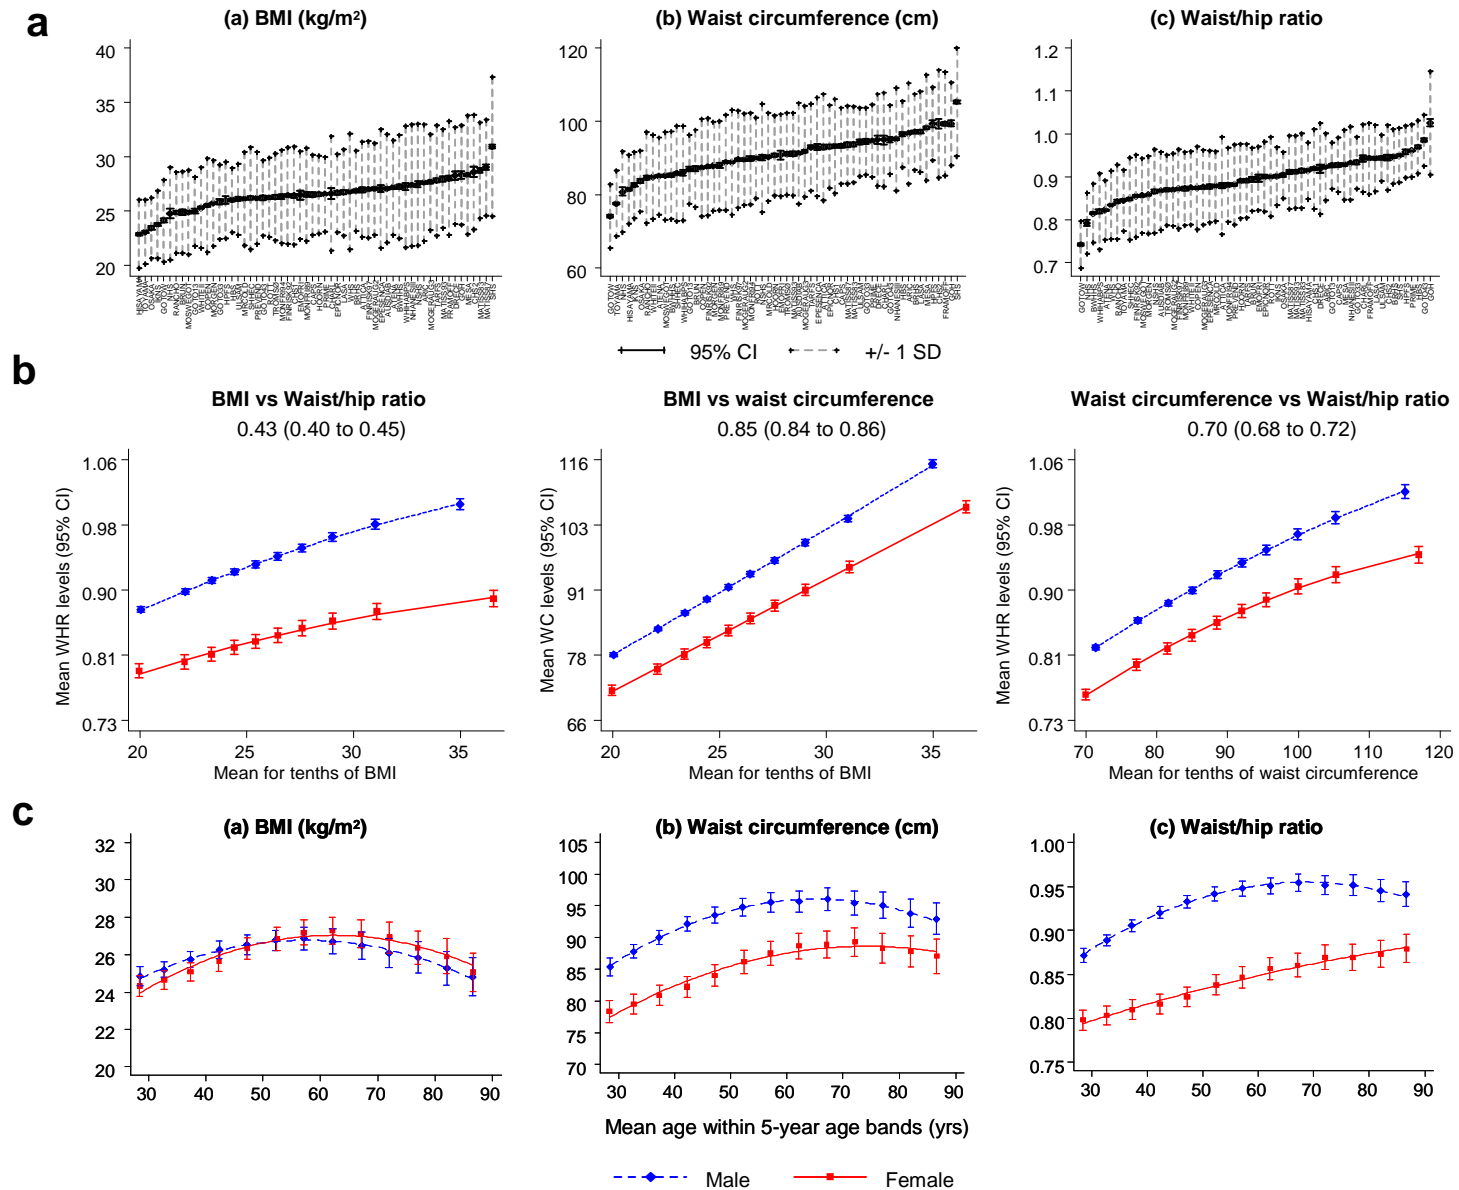

For cross-sectional associations between adiposity measures (part b), see also footnote to eFigures 3-4. The values presented above each figure in part b correspond to the age- and sex- adjusted partial correlation coefficient (95% CI) between adiposity measures in males and females combined. eAppendix lists study acronyms.

**Figure 3 Cross-sectional associations of adiposity measures with lipid markers**

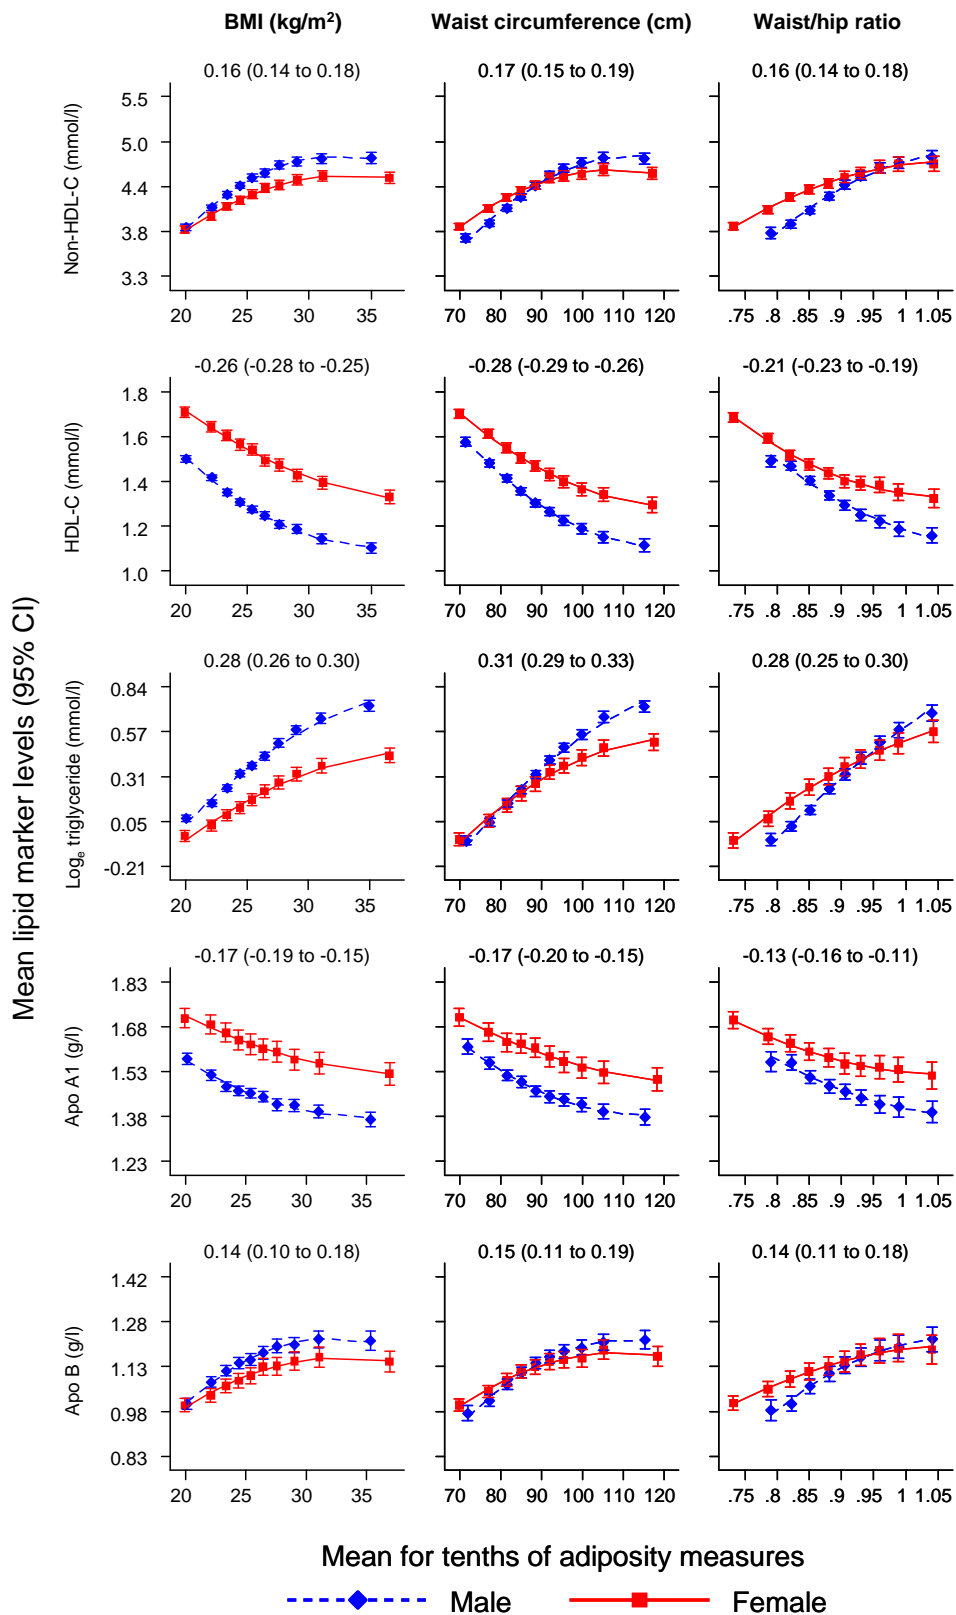

Mean lipid levels were adjusted to age 50 years. The values presented above each figure correspond to the age- and sex-adjusted partial correlation coefficient (95% CI) between lipid markers and adiposity measures in males and females combined. Lowest waist/hip ratio category in males was removed because it included only a few individuals. Error bars represent the 95% CIs.

**eFigure 4 Cross-sectional associations of adiposity measures with systolic blood pressure, fasting glucose and some inflammatory markers**

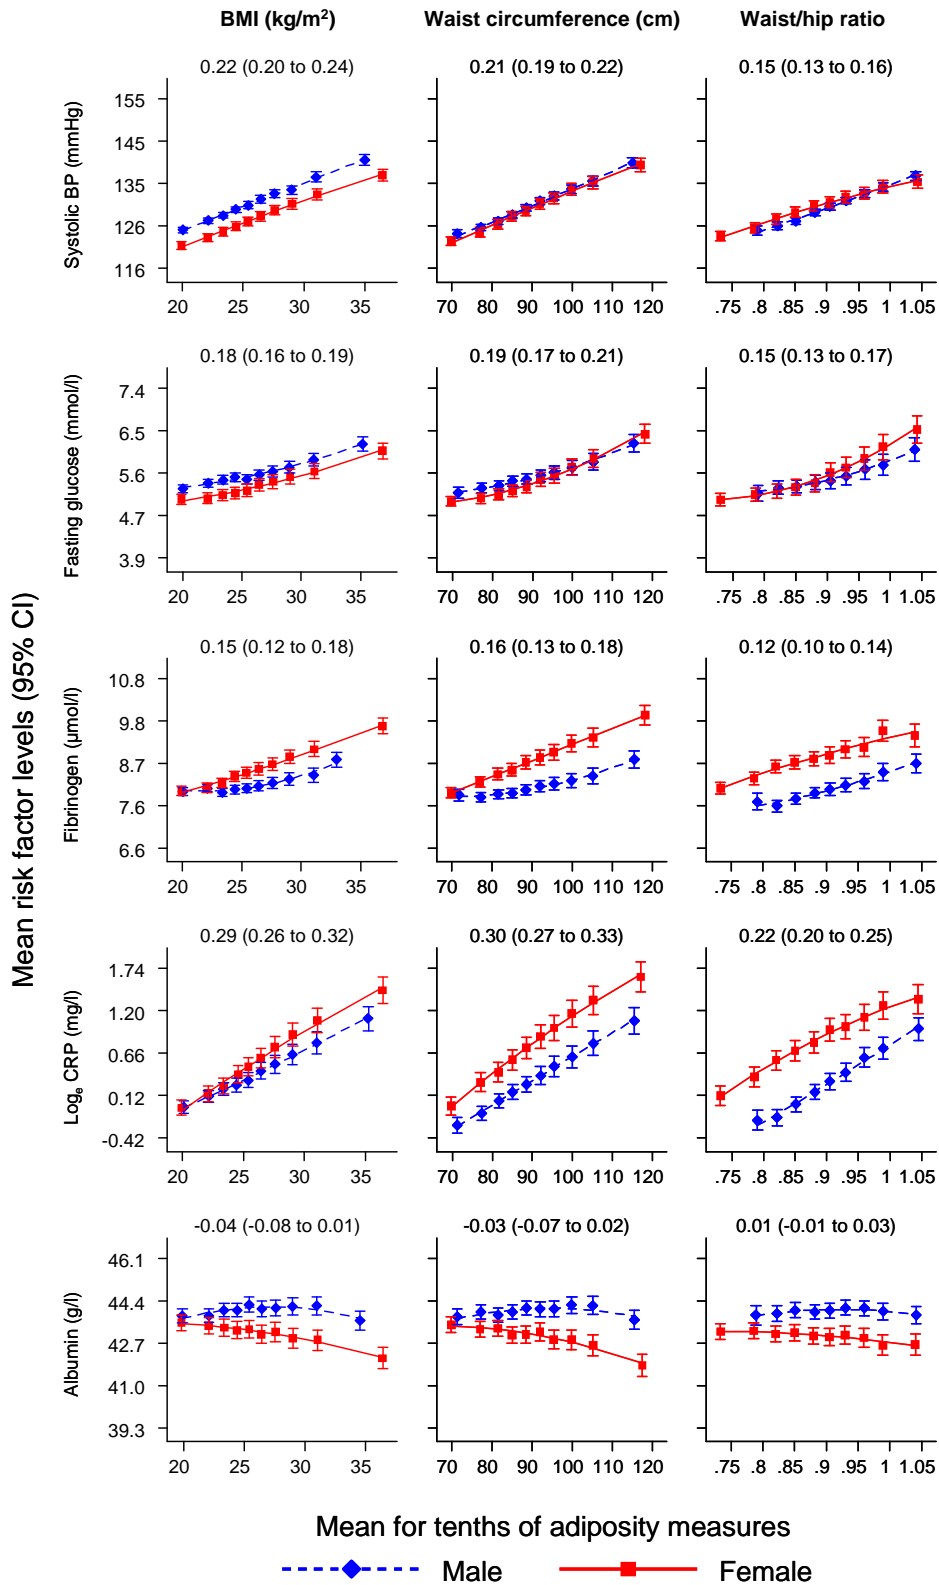

Mean risk factor levels were adjusted to age 50 years. The values presented above each figure correspond to the age- and sex- adjusted partial correlation coefficient (95% CI) between risk markers and adiposity measures in males and females combined. Lowest waist/hip ratio category in males was removed because it included only a few individuals. Error bars represent the 95% CIs.

**Figure 5 Mean risk factors levels across thirds of waist circumference and waist-to-hip ratio by baseline BMI levels**

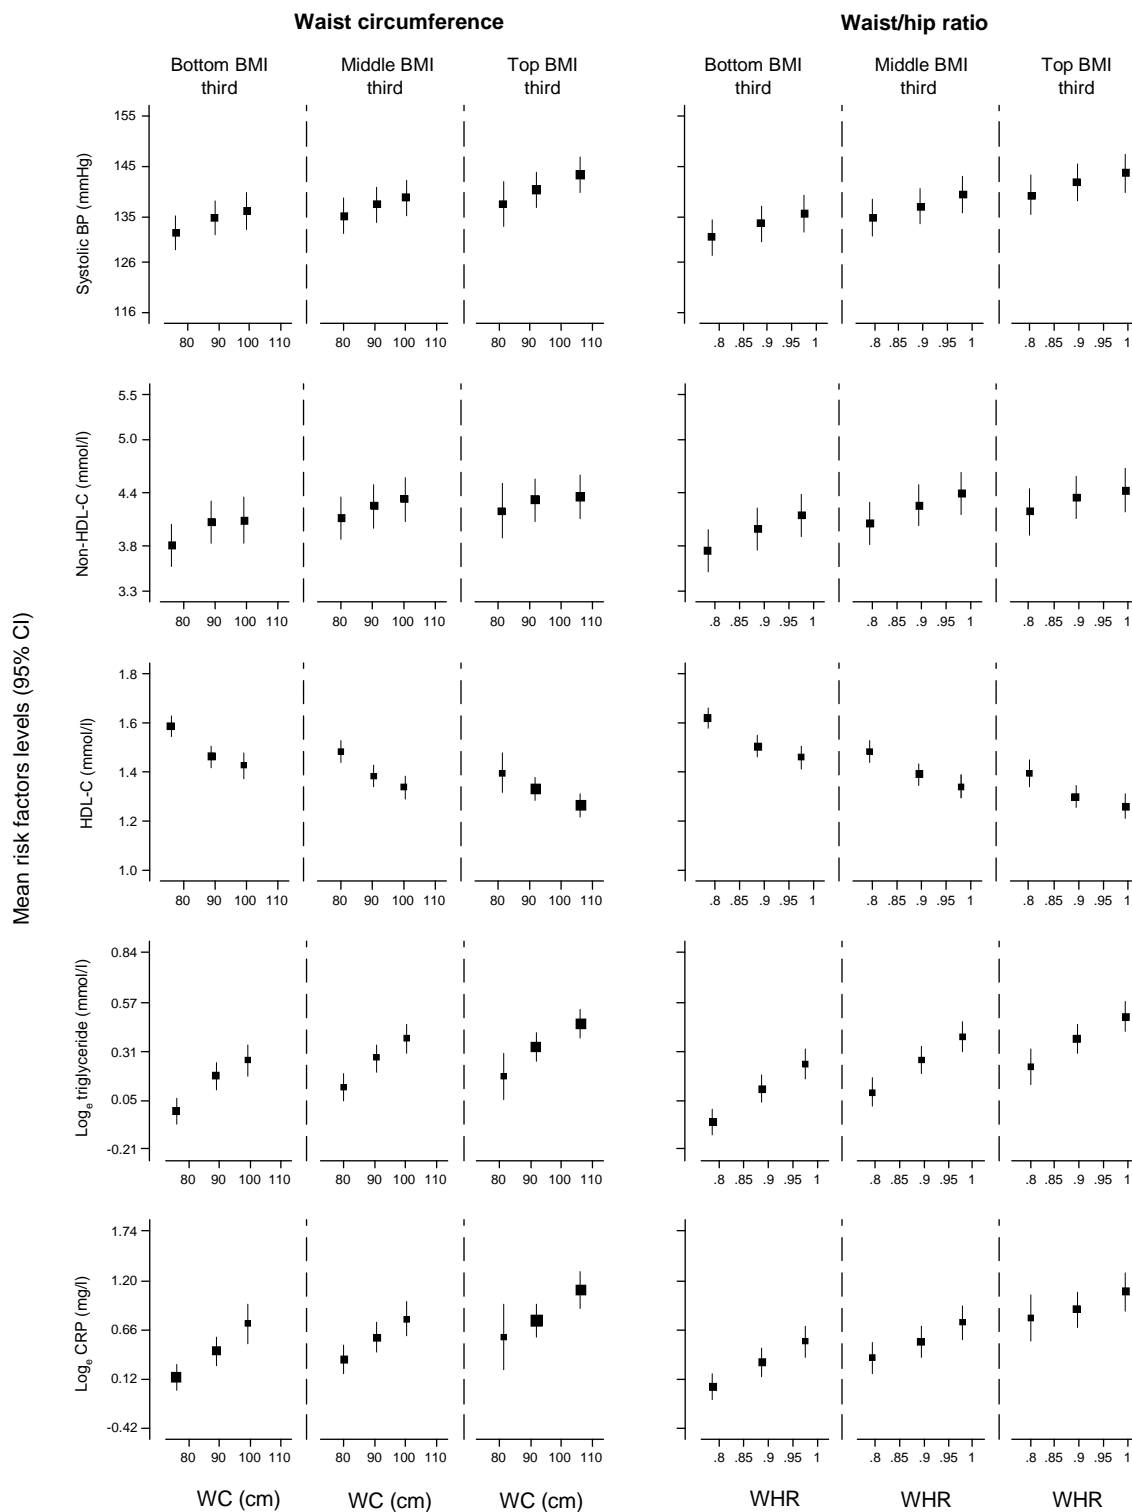



**eFigure 6 Mean waist circumference and waist-to-hip ratio levels by diabetes status at baseline, according to deciles of BMI levels**

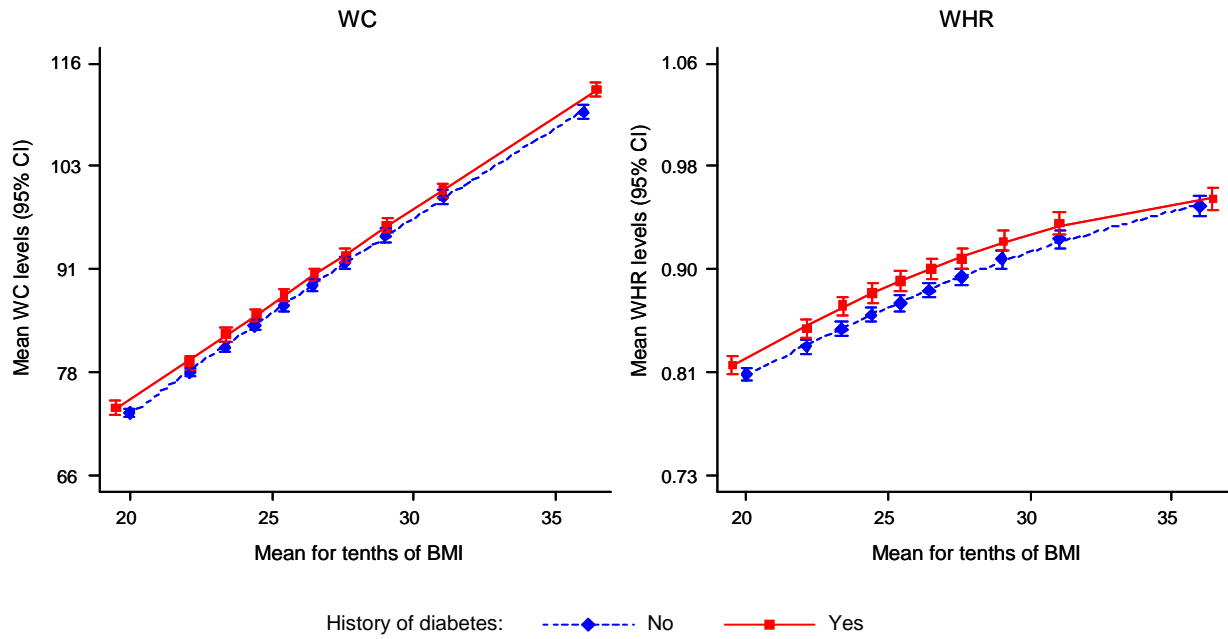

Mean waist circumference and waist-to-hip ratio levels were adjusted to age 50 years. Age, sex and BMI adjusted differences between people with and without history of diabetes were 1.52cm (95% CI: 1.27cm-1.77cm) with waist circumference and 0.018 (95% CI: 0.015-0.021) with waist-to-hip ratio. Error bars represent the 95% CIs.

**Figure 7 Regression dilution ratios for adiposity measure levels plotted against time since baseline measurement by study**

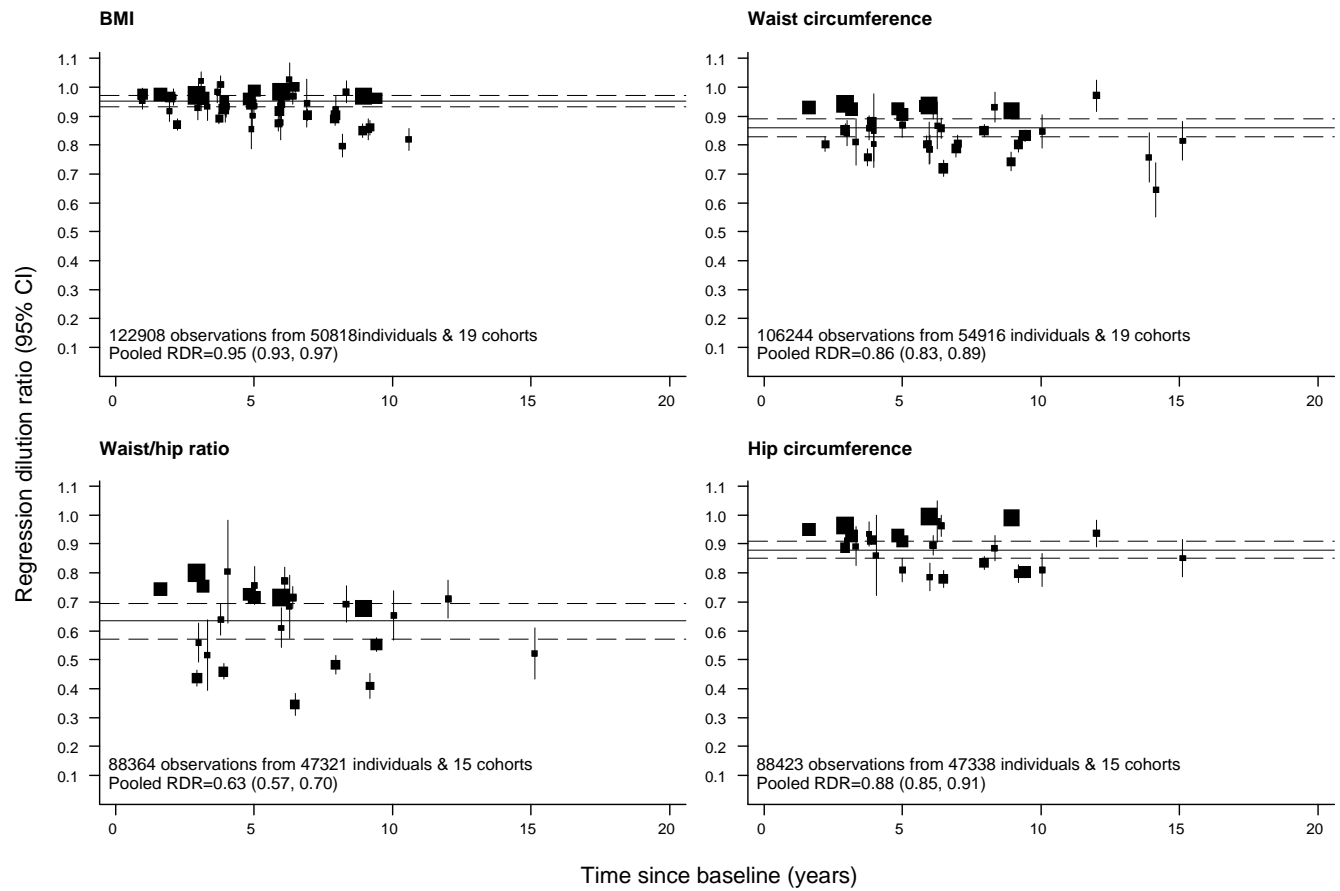

Analyses were adjusted for age at baseline and sex. Re-surveys after 20 years since baseline were excluded from figure. CI indicates confidence interval. The RDRs for waist/hip ratio are lower in comparison to the separate RDRs for waist and hip, largely due to a relative decrease in the between-person variance for the ratio measure as a result of highly correlated and similarly distributed waist and hip measures (ie, for two similarly distributed measures, the between-person variance of the ratio tends to zero as their correlation approaches one). The reduction in the between-person variability leads to a relatively larger within-person variance and subsequently reduced RDRs.

RDRs were 0.75 (0.72, 0.79) for HDL-C, 0.63 (0.59, 0.67) for non-HDL-C, 0.65 (0.61, 0.68) for  $\log_e$  triglyceride, and 0.57 (0.52, 0.61) for systolic blood pressure.

**Figure 8 Hazard ratios for coronary heart disease by clinically defined categories of baseline BMI and waist circumference levels**

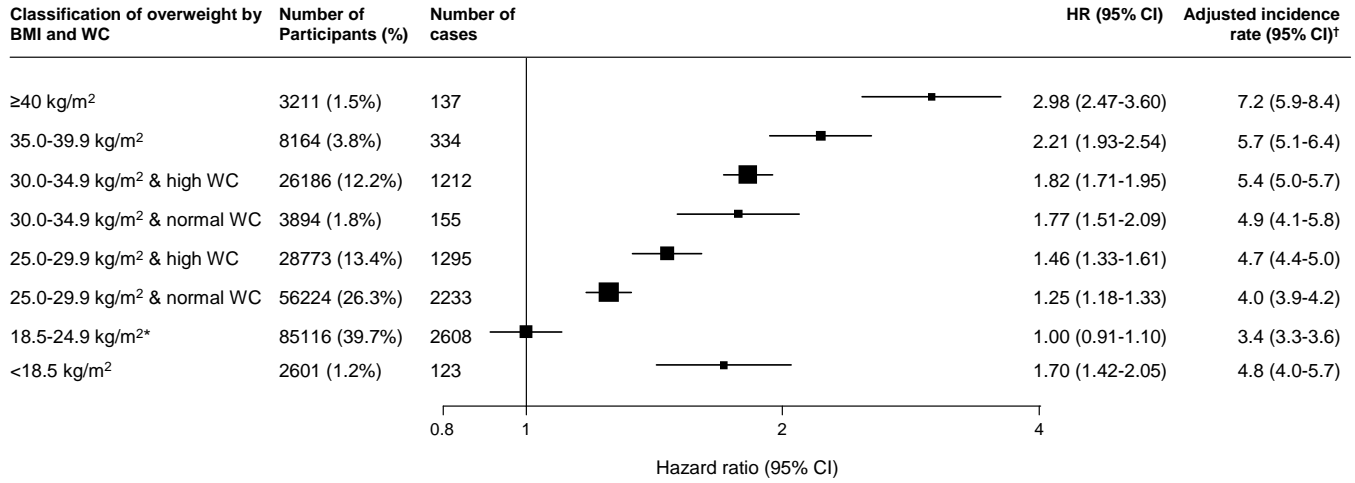

\*Reference group

<sup>†</sup>Sex and smoking adjusted incidence rates of CHD per 1000 person-years. Analyses excluded nested case-control studies and were based on 215,856 participants (involving 7397 cases).

Analysis was based on 214,169 participants (involving 8097 cases) from 52 studies. Hazard ratios (HRs) were adjusted for age and smoking status at baseline, and stratified, where appropriate, by sex. Adjusted study-specific log HRs were combined by multivariate random effects meta-analysis. High waist circumference (WC) was defined as waist circumference >102 cm in men and waist circumference >88 cm in women.

**Figure 9 Hazard ratios for coronary heart disease and ischaemic stroke across quintiles of baseline BMI, waist circumference and waist-to-hip ratio levels, among men and women**

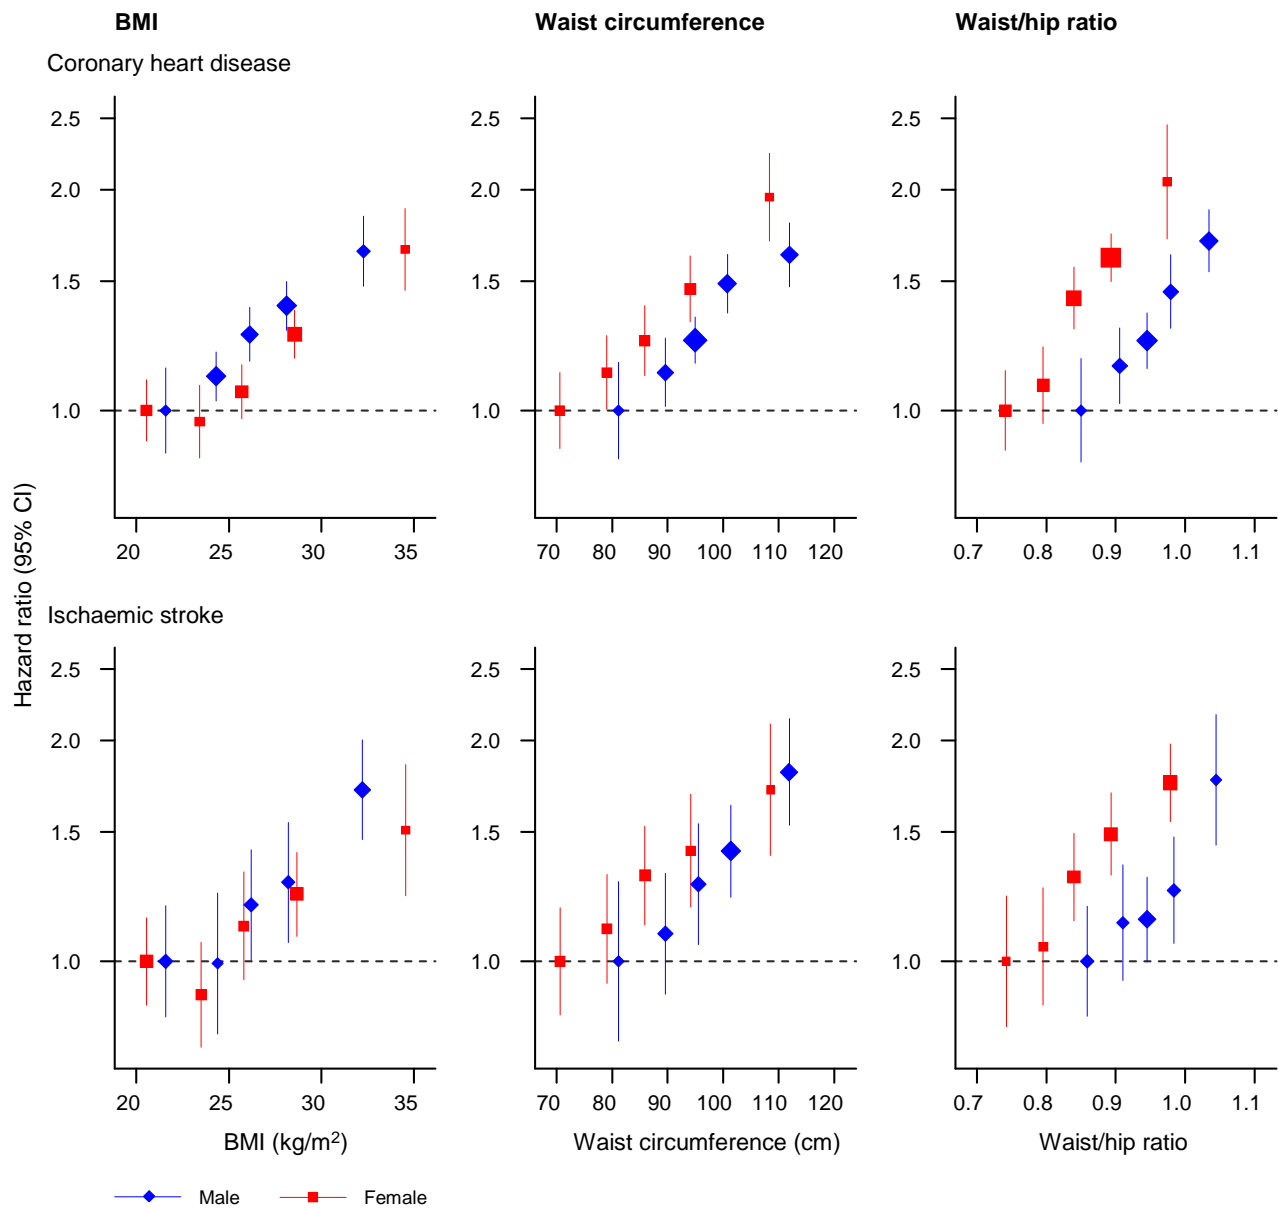

Analyses were restricted to studies with data on both males and females. Analyses for coronary heart disease were based on 67001 men (involving 3818 cases) and 78197 women (involving 2719 cases) from 19 studies. Analyses for ischaemic stroke were based on 32806 men (involving 883 cases) and 42295 women (involving 1034 cases) from 16 studies. Regression analyses were adjusted for age and smoking status. Adjusted study-specific log hazard ratios were combined by multivariate random effects meta-analysis. The y-axes are shown on a log scale.

**eFigure 10 Hazard ratios for coronary heart disease across thirds of waist circumference and waist-to-hip ratio by baseline levels of triglyceride**

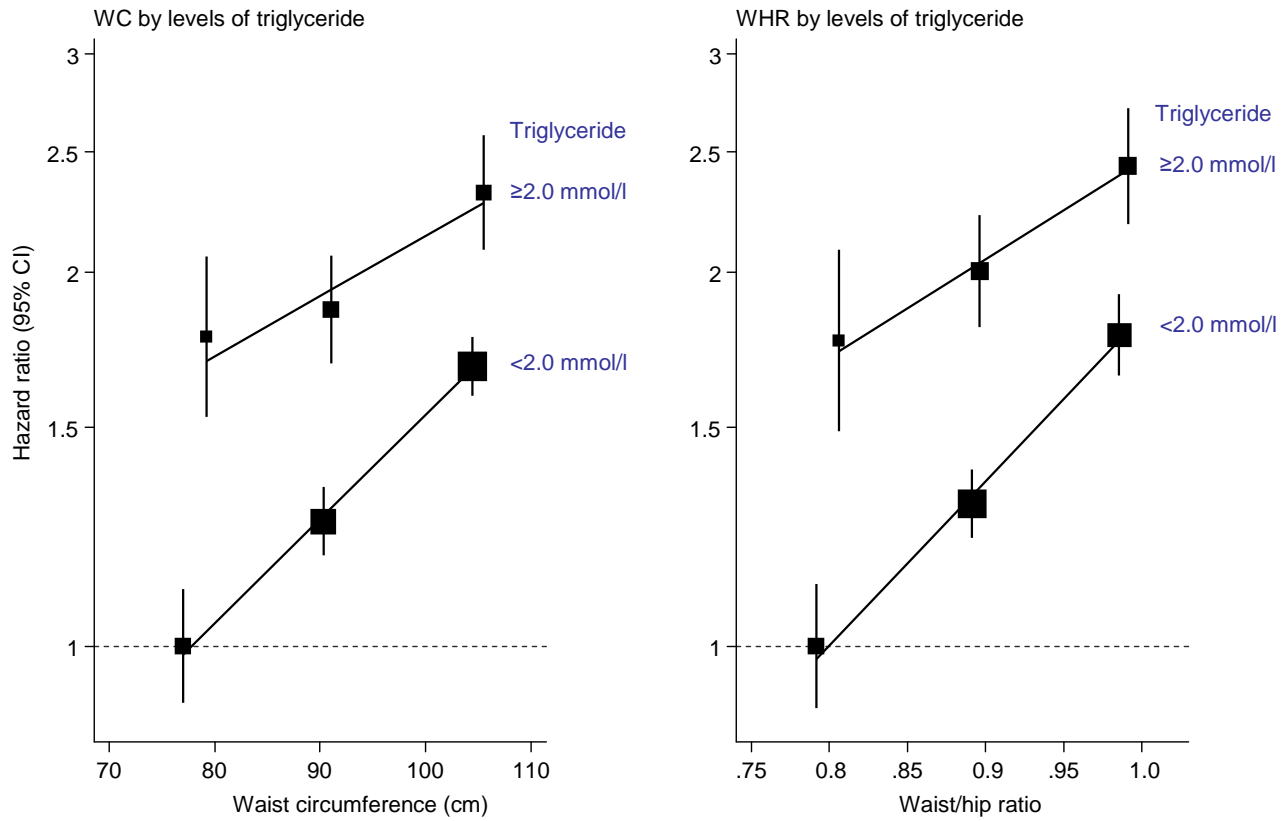

Analysis was based on 141,203 participants (involving 5684 cases) from 41 studies. Regression analyses were adjusted for age at baseline and smoking status, and stratified, where appropriate, by sex. Adjusted study-specific log hazard ratios were combined by multivariate random effects meta-analysis. The y-axes are shown on a log scale. Referent groups are the lowest third of waist circumference or waist-to-hip ratio in the lower level of triglyceride.

**eFigure 11 Hazard ratios for coronary heart disease per 1-SD higher baseline BMI, waist circumference and waist-to-hip ratio levels, according to several individual and study level characteristics**

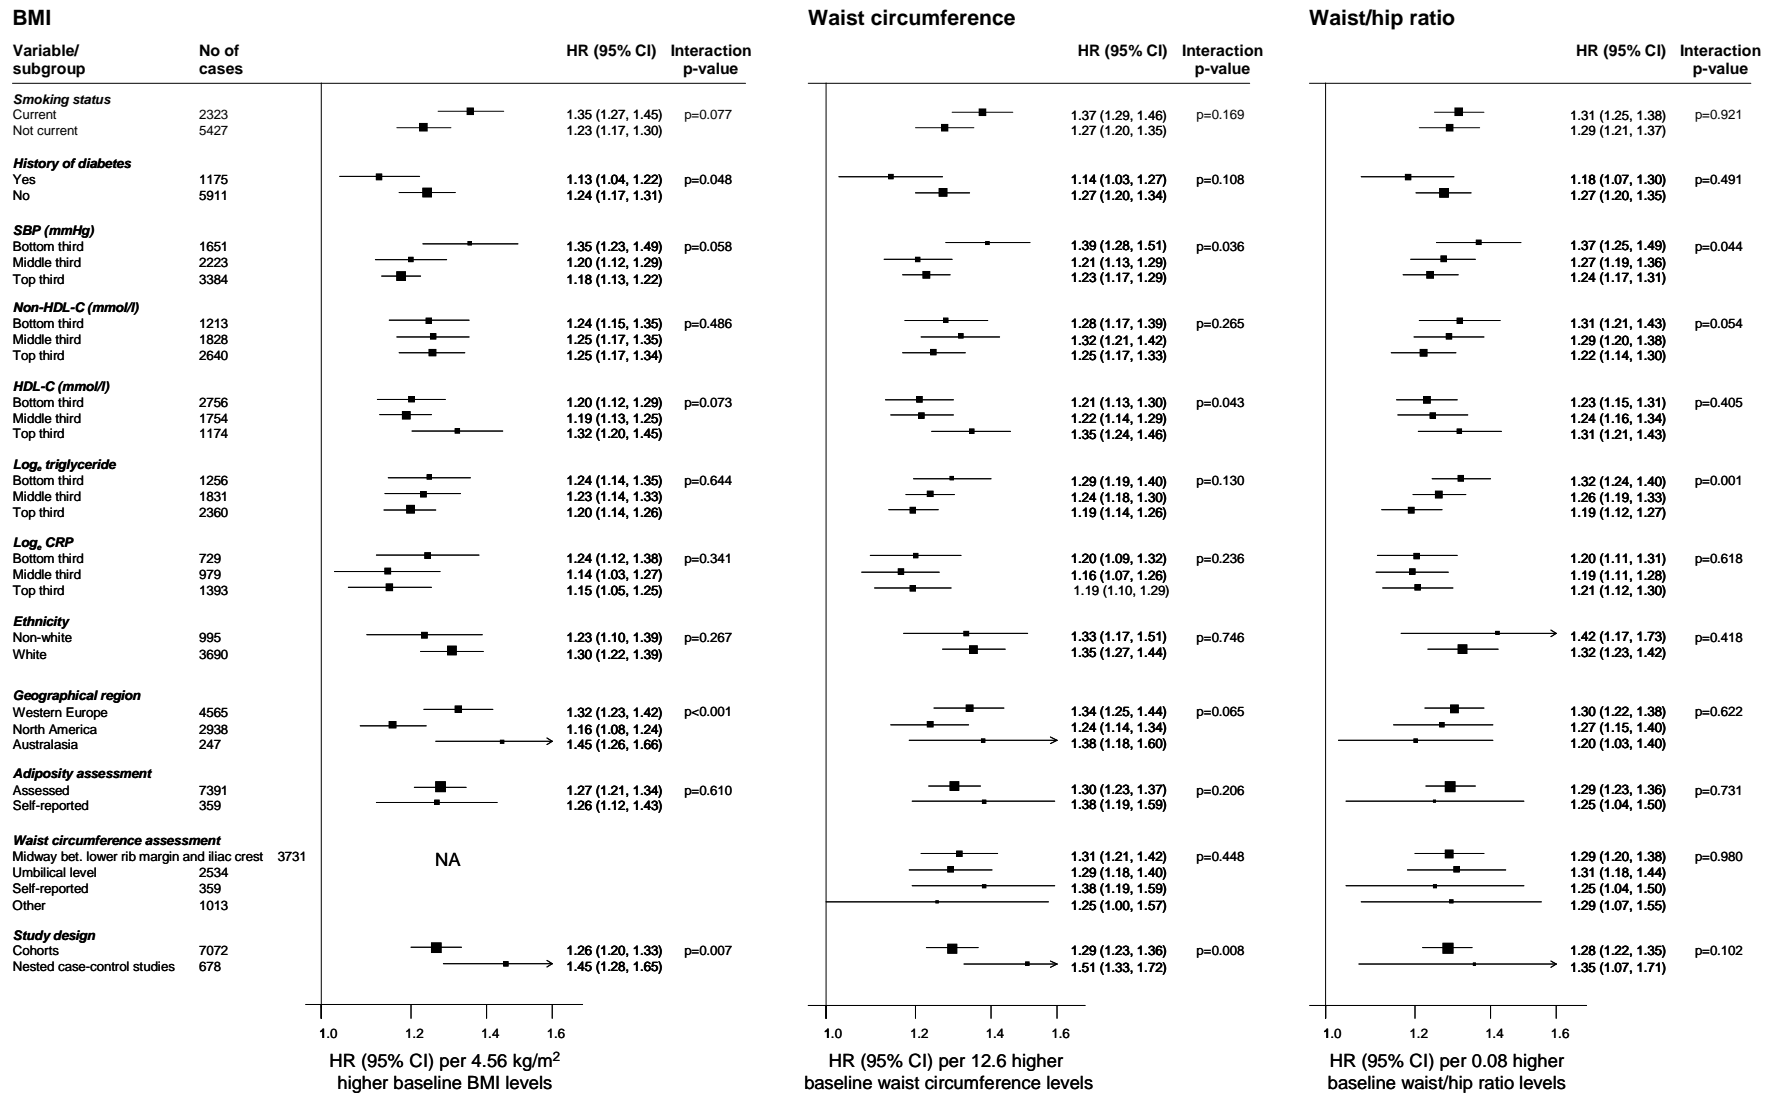

Study-specific hazard ratios (HRs) were adjusted for age and smoking, and stratified, where appropriate, by sex. Analyses were restricted to participant with BMI values of 20 kg/m<sup>2</sup> or higher. CI indicates confidence interval. NA, not applicable

**eFigure 12 Study-specific hazard ratios for coronary heart disease per 1-SD higher baseline levels of adiposity measures, adjusted for age, sex, and smoking status in the BMI range  $\geq 20$  kg/m<sup>2</sup>**

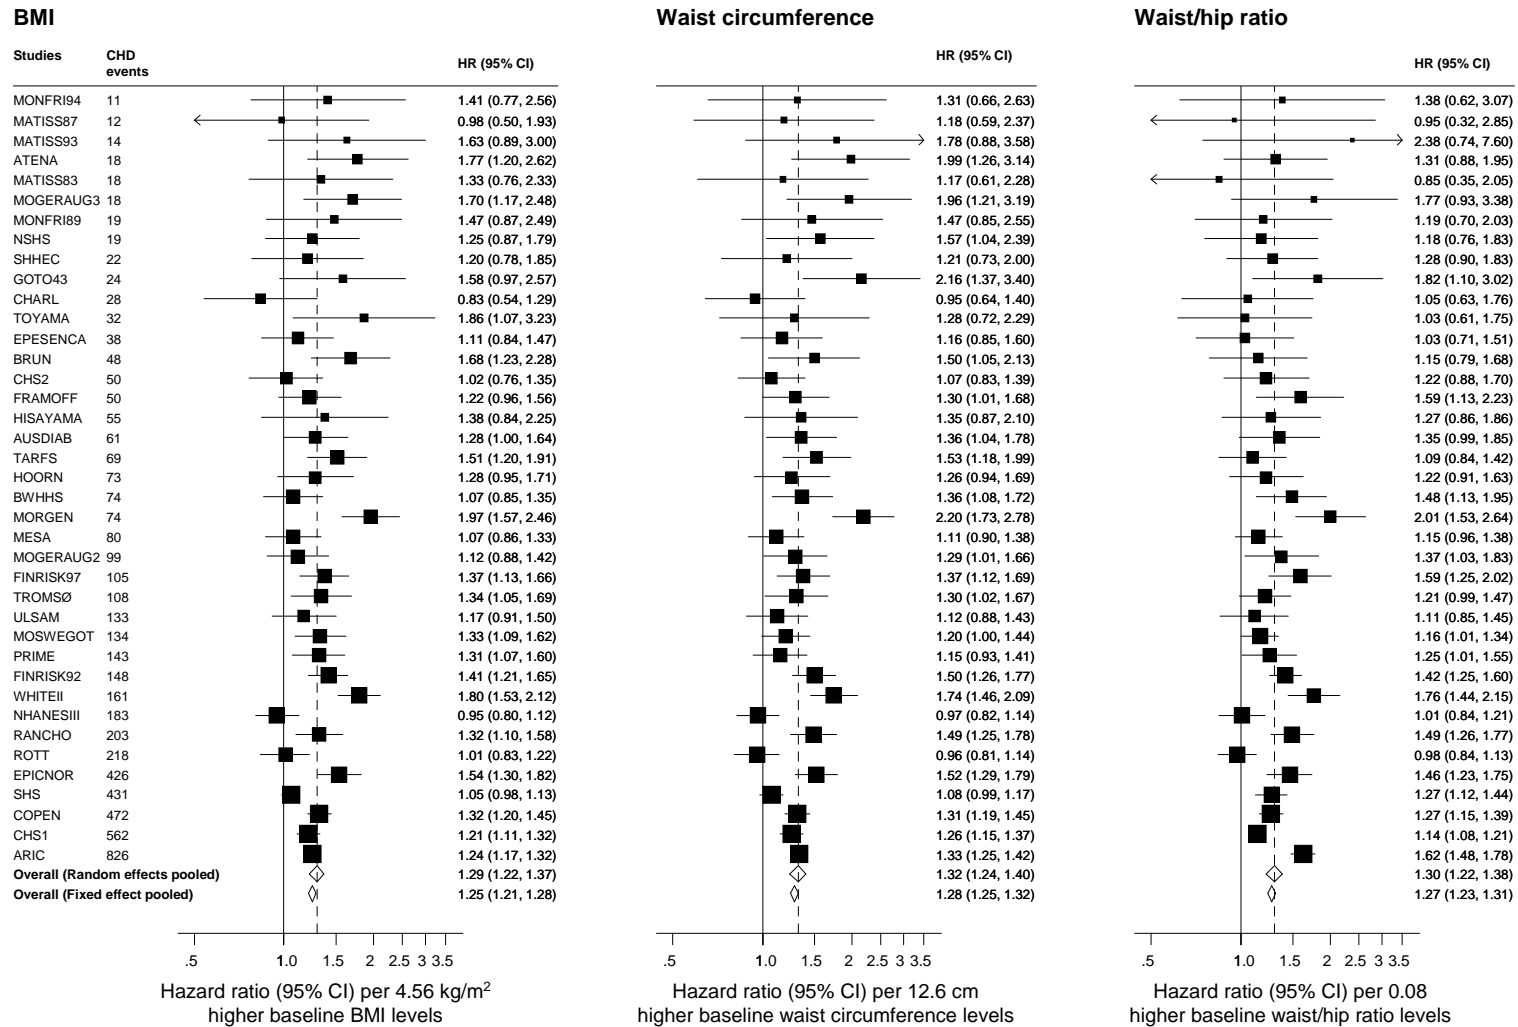

Analyses were restricted to participants with BMI values of 20 kg/m<sup>2</sup> or higher and complete information on age, sex, smoking status, history of diabetes, systolic blood pressure and total and HDL cholesterol.

In the BMI analysis, after excluding the 6 most discrepant studies (CHARL, MATISS87, NHANESIII, MORGEN, TOYOMA, WHITEII) the hazard ratio was 1.26 (95% CI 1.20, 1.33) and the I<sup>2</sup> was reduced to 45% (95% CI 17%-64%). In the WC analysis, after excluding the 6 most discrepant studies (CHARL, NHANESIII, ROTT, ATENA, GOTO43, MORGEN) the hazard ratio was 1.31 (95% CI 1.25, 1.38) and the I<sup>2</sup> was reduced to 40% (95% CI 9%-61%). In the waist/hip ratio analysis, after excluding the 6 most discrepant studies (MATISS83, MATISS87, ROTT, GOTO43, MATISS93, MORGEN) the hazard ratio was 1.30 (95% CI 1.22, 1.37) and the I<sup>2</sup> was reduced to 61% (95% CI 43%-73%).

**eFigure 13** Funnel plots assessing potential bias due to small studies in the meta-analysis of adiposity measure and coronary heart disease risk

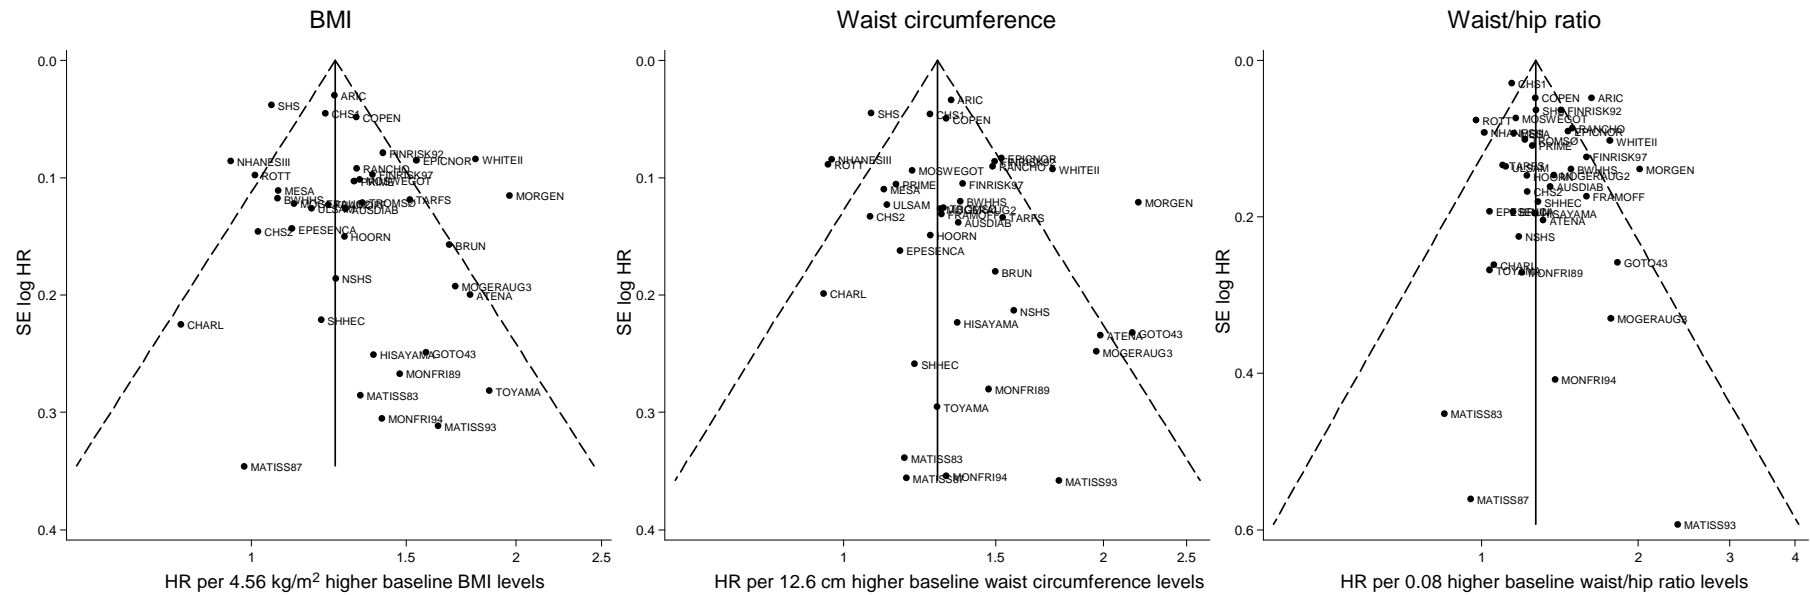

Analyses were restricted to participants with BMI values of 20 kg/m<sup>2</sup> or higher and complete information on age, sex, smoking status, history of diabetes, systolic blood pressure, and total and HDL cholesterol. Dotted lines represent pseudo 95% CI.

There was no evidence of bias from small-study effects for BMI ( $p=0.123$ ), waist circumference ( $p=0.211$ ) and waist-to-hip ratio ( $p=0.414$ ) using Egger's test of small-study effects.



**Figure 14 Changes in C-index for cardiovascular disease risk prediction on omission of individual risk factors from a full model containing the Framingham risk score covariates plus BMI, waist circumference or waist-to-hip ratio in participants without diabetes at baseline**

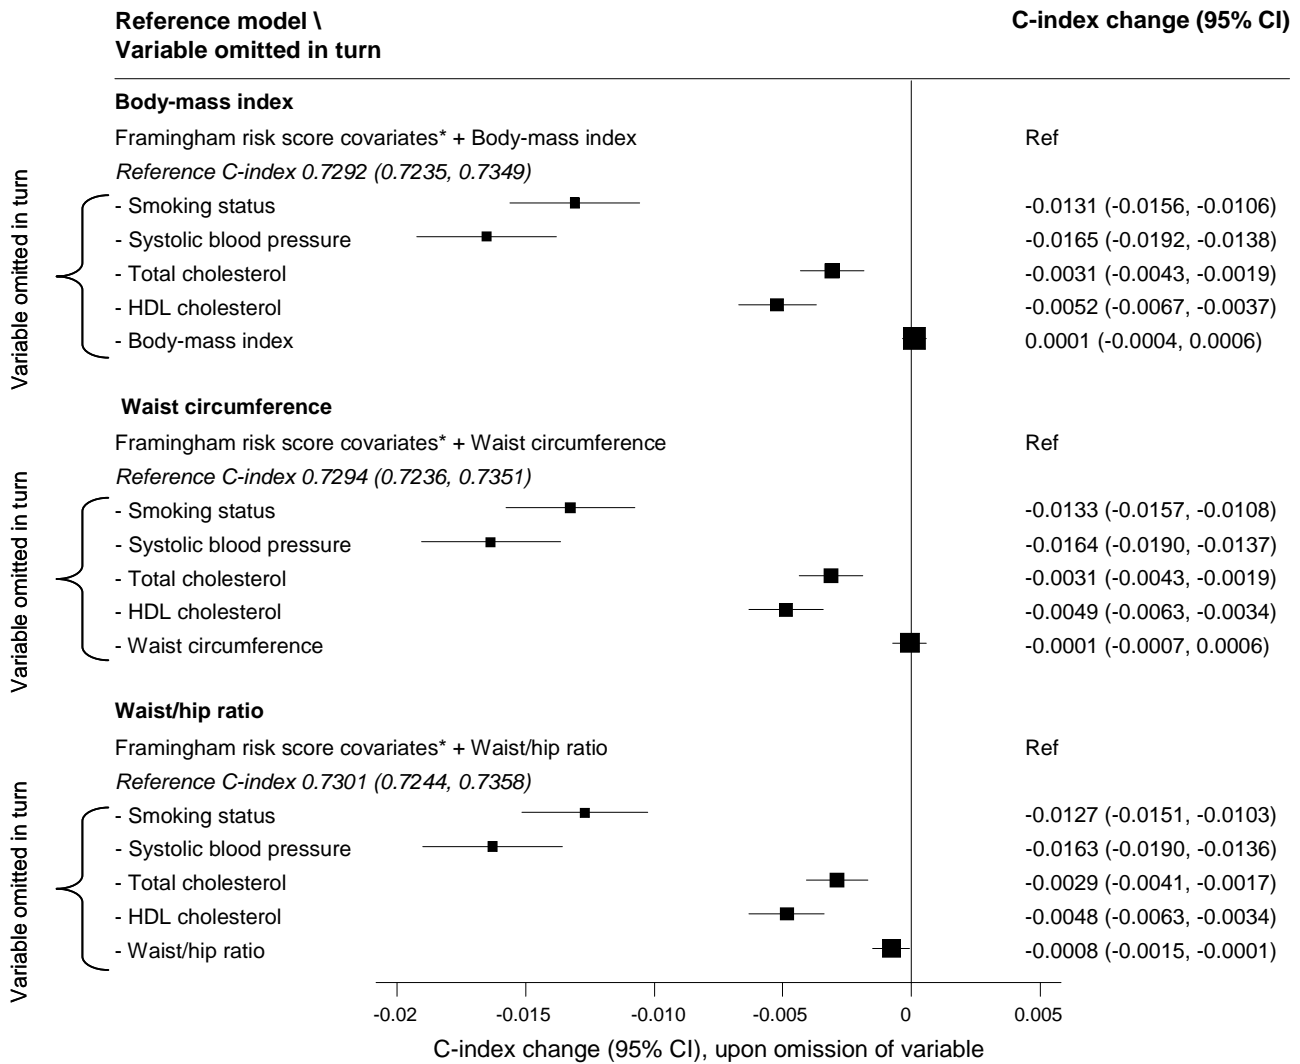

\*The Framingham covariates include age, smoking status, systolic blood pressure, history of diabetes, and total and HDL cholesterol. Model was stratified by sex.

Analyses involved 134,287 participants (39 studies) with 6715 cardiovascular events. Analyses are restricted to participants with BMI values of 20 kg/m<sup>2</sup> or higher.

**eFigure 15 Changes in C-index for cardiovascular disease risk prediction upon addition of BMI, waist circumference or waist-to-hip ratio on top of Framingham risk score covariates, according to different subgroups**

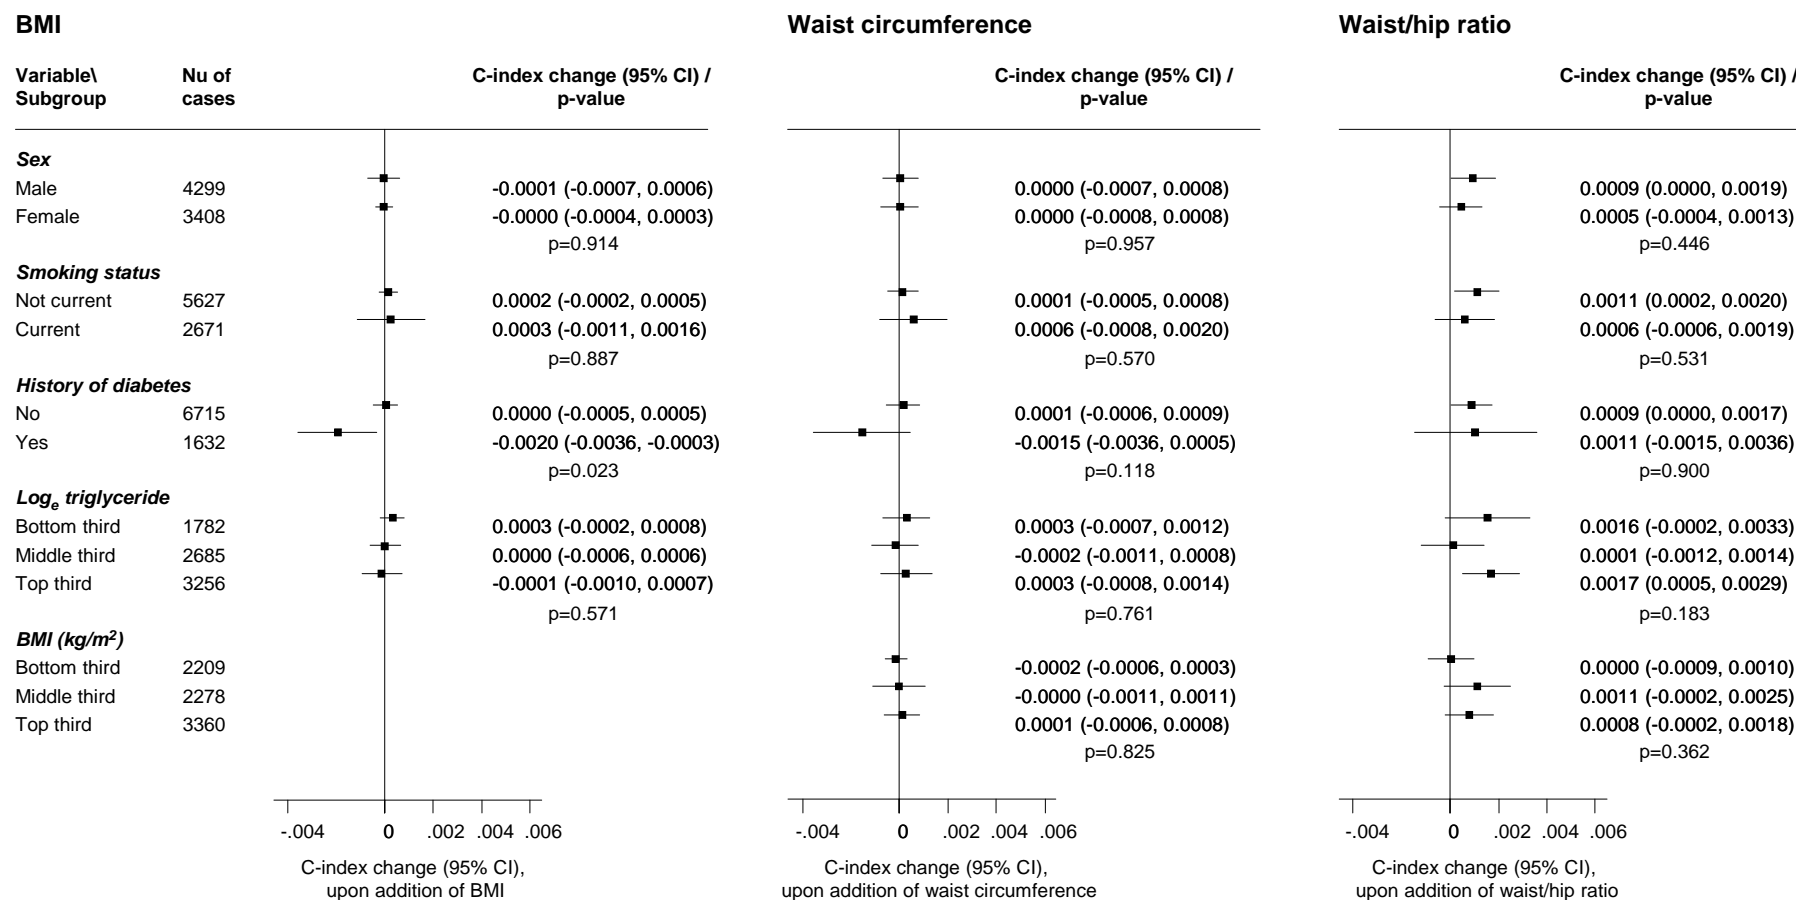

Models contain all Framingham covariates (age, systolic blood pressure, smoking status, history of diabetes and total and HDL-cholesterol) with and without inclusion of BMI, waist circumference or waist-to-hip ratio. Predictive ability added by BMI, waist circumference or waist-to-hip ratio is given, with a p-value testing the null hypothesis of no difference in effect between levels of each subgroup. Error bars indicate 95% confidence limits. In each case only studies with information on both subgroup levels are used. Not all studies used had full information across all subgroups levels, so comparisons across subgroups (eg, men vs smokers) are not reliable due to inclusion of between study differences.

**eAppendix** List of study acronyms and study references

**ARIC**, Atherosclerosis Risk in Communities Study  
**ATTICA**, ATTICA Study  
**AUSDIAB**, Australian Diabetes, Obesity and Lifestyle Study  
**BRHS**, British Regional Heart Study  
**BRUN**, Bruneck Study  
**BWHHS**, British Women's Heart and Health Study  
**CAPS**, Caerphilly Prospective Study  
**CHARL**, Charleston Heart Study  
**CHS**, Cardiovascular Health Study  
**COPEN**, Copenhagen City Heart Study  
**CUORE**, Progetto CUORE  
**DRECE**, Diet and Risk of Cardiovascular Disease in Spain  
**EPESENCA**, The Established Populations for the Epidemiologic Study of the Elderly Studies, North Carolina  
**EPICNOR**, EPIC Norfolk Study  
**FINRISK92**, Finrisk Cohort 1992  
**FINRISK97**, Finrisk Cohort 1997  
**FRAMOFF**, Framingham Offspring Cohort  
**GOH**, The Glucose Intolerance, Obesity and Hypertension Study  
**GOTO13**, Göteborg 1913 Study  
**GOTO33**, Göteborg 1933 Study  
**GOTO43**, Göteborg 1943 Study  
**GOTOW**, Population Study of Women in Gothenburg, Sweden  
**HBS**, Helsinki Businessmen Study  
**HISAYAMA**, Hisayama Study  
**HOORN**, Hoorn Study  
**HPFS**, Health Professionals Follow-up Study  
**IKNS**, Ikawa, Kyowa, and Noichi Study  
**LASA**, Longitudinal Aging Study Amsterdam  
**MESA**, Multi-Ethnic Study of Atherosclerosis  
**MOGERAUG2**, MONICA/KORA Augsburg Survey S2  
**MOGERAUG3**, MONICA/KORA Augsburg Survey S3  
**MORGEN**, Monitoring Project on Chronic Disease Risk Factors  
**MOSWEGOT**, MONICA Göteborg Study  
**MRCOLD**, MRC Study of Older People  
**NHANESIII**, Third National Health and Nutrition Examination Survey  
**NHS**, Nurses' Health Study  
**NSHS**, Nova Scotia Health Survey  
**OSAKA**, Osaka Study  
**PREVEND**, Prevention of Renal and Vascular End Stage Disease Study  
**PRIME**, Prospective Epidemiological Study of Myocardial Infarction  
**RANCHO**, Rancho Bernardo Study  
**ROTT**, The Rotterdam Study  
**SHHEC**, Scottish Heart Health Extended Cohort  
**SHS**, Strong Heart Study  
**TARFS**, Turkish Adult Risk Factor Study  
**TOYAMA**, Toyama  
**TROMSØ**, Tromsø Study  
**ULSAM**, Uppsala Longitudinal Study of Adult Men  
**WHIHBAPS**, Women's Health Initiative (Hormones and Biomarkers Predicting Stroke in Women)  
**WHITE2**, Whitehall II Study  
**WHS**, Women's Health Study

Reference list of participating studies (48 references represent the 58 studies that provided data relevant to these analyses)

- (1) Folsom AR, Stevens J, Schreiner PJ, McGovern PG. Body mass index, waist/hip ratio, and coronary heart disease incidence in African Americans and whites. Atherosclerosis Risk in Communities Study Investigators. *Am J Epidemiol*. 1998;148:1187-1194.
- (2) Panagiotakos DB, Chrysohoou C, Pitsavos C et al. Hierarchical analysis of anthropometric indices in the prediction of 5-year incidence of hypertension in apparently healthy adults: the ATTICA study. *Atherosclerosis*. 2009;206:314-320.
- (3) Snijder MB, Zimmet PZ, Visser M, Dekker JM, Seidell JC, Shaw JE. Independent and opposite associations of waist and hip circumferences with diabetes, hypertension and dyslipidemia: the AusDiab Study. *Int J Obes Relat Metab Disord*. 2004;28:402-409.
- (4) Lawlor DA, Ebrahim S, Whincup P et al. Sex differences in body fat distribution and carotid intima media thickness: cross sectional survey using data from the British regional heart study. *J Epidemiol Community Health*. 2004;58:700-704.
- (5) Bonora E, Kiechl S, Willeit J et al. Metabolic syndrome: epidemiology and more extensive phenotypic description. Cross-sectional data from the Bruneck Study. *Int J Obes Relat Metab Disord*. 2003;27:1283-1289.
- (6) Lawlor DA, Davey Smith G, Ebrahim S. Hyperinsulinaemia and increased risk of breast cancer: findings from the British Women's Heart and Health Study. *Cancer Causes Control*. 2004;15:267-275.
- (7) Yarnell JW, Patterson CC, Thomas HF, Sweetnam PM. Central obesity: predictive value of skinfold measurements for subsequent ischaemic heart disease at 14 years follow-up in the Caerphilly Study. *Int J Obes Relat Metab Disord*. 2001;25:1546-1549.
- (8) Stevens J, Keil JE, Rust PF et al. Body mass index and body girths as predictors of mortality in black and white men. *Am J Epidemiol*. 1992;135:1137-1146.
- (9) Mozaffarian D, Kamineni A, Carnethon M, Djousse L, Mukamal KJ, Siscovick D. Lifestyle risk factors and new-onset diabetes mellitus in older adults: the cardiovascular health study. *Arch Intern Med*. 2009;169:798-807.
- (10) Benn M, Nordestgaard BG, Jensen GB, Tybjaerg-Hansen A. Improving prediction of ischemic cardiovascular disease in the general population using apolipoprotein B: the Copenhagen City Heart Study. *Arterioscler Thromb Vasc Biol*. 2007;27:661-670.
- (11) Giampaoli S, Palmieri L, Panico S et al. Favorable cardiovascular risk profile (low risk) and 10-year stroke incidence in women and men: findings from 12 Italian population samples. *Am J Epidemiol*. 2006;163:893-902.
- (12) Ballesteros-Pomar MD, Rubio-Herrera MA, Gutierrez-Fuentes JA et al. Dietary habits and cardiovascular risk in the Spanish population: the DRECE study (I). Diet and Cardiovascular Events Risk in Spain. *Ann Nutr Metab*. 2000;44:108-114.
- (13) Blazer DG, Hybels CF, Fillenbaum GG. Metabolic syndrome predicts mobility decline in a community-based sample of older adults. *J Am Geriatr Soc*. 2006;54:502-506.
- (14) Lahti-Koski M, Pietinen P, Heliovaara M, Vartiainen E. Associations of body mass index and obesity with physical activity, food choices, alcohol intake, and smoking in the 1982-1997 FINRISK Studies. *Am J Clin Nutr*. 2002;75:809-817.
- (15) McKeown NM, Meigs JB, Liu S, Wilson PW, Jacques PF. Whole-grain intake is favorably associated with metabolic risk factors for type 2 diabetes and cardiovascular disease in the Framingham Offspring Study. *Am J Clin Nutr*. 2002;76:390-398.
- (16) Modan M, Halkin H, Fuchs Z et al. Hyperinsulinemia--a link between glucose intolerance, obesity, hypertension, dyslipoproteinemia, elevated serum uric acid and internal cation imbalance. *Diabete Metab*. 1987;13:375-380.
- (17) Larsson B, Svardsudd K, Welin L, Wilhelmsen L, Bjorntorp P, Tibblin G. Abdominal adipose tissue distribution, obesity, and risk of cardiovascular disease and death: 13 year follow up of participants in the study of men born in 1913. *Br Med J (Clin Res Ed)*. 1984;288:1401-1404.
- (18) Rosengren A, Eriksson H, Larsson B et al. Secular changes in cardiovascular risk factors over 30 years in Swedish men aged 50: the study of men born in 1913, 1923, 1933 and 1943. *J Intern Med*. 2000;247:111-118.
- (19) Lapidus L, Bengtsson C, Larsson B, Pennert K, Rybo E, Sjostrom L. Distribution of adipose tissue and risk of cardiovascular disease and death: a 12 year follow up of participants in the population study of women in Gothenburg, Sweden. *Br Med J (Clin Res Ed)*. 1984;289:1257-1261.
- (20) Strandberg TE, Salomaa VV, Vanhanen HT, Naukkarinen VA, Sarna SJ, Miettinen TA. Mortality in participants and non-participants of a multifactorial prevention study of cardiovascular diseases: a 28 year follow up of the Helsinki Businessmen Study. *Br Heart J*. 1995;74:449-454.

- (21) Nakashima Y, Kiyohara Y, Doi Y, Kubo M, Iida M, Sueishi K. Risk factors for coronary atherosclerosis in a general Japanese population: the Hisayama study. *Pathol Res Pract*. 2009;205:700-708.
- (22) Wedick NM, Snijder MB, Dekker JM et al. Prospective investigation of metabolic characteristics in relation to weight gain in older adults: the Hoorn Study. *Obesity (Silver Spring)*. 2009;17:1609-1614.
- (23) Iso H, Naito Y, Sato S et al. Serum triglycerides and risk of coronary heart disease among Japanese men and women. *Am J Epidemiol*. 2001;153:490-499.
- (24) Visser M, Launer LJ, Deurenberg P, Deeg DJ. Total and sports activity in older men and women: relation with body fat distribution. *Am J Epidemiol*. 1997;145:752-761.
- (25) Bahrami H, Bluemke DA, Kronmal R et al. Novel metabolic risk factors for incident heart failure and their relationship with obesity: the MESA (Multi-Ethnic Study of Atherosclerosis) study. *J Am Coll Cardiol*. 2008;51:1775-1783.
- (26) Meisinger C, Doring A, Thorand B, Heier M, Lowel H. Body fat distribution and risk of type 2 diabetes in the general population: are there differences between men and women? The MONICA/KORA Augsburg cohort study. *Am J Clin Nutr*. 2006;84:483-489.
- (27) van D, I, Kromhout D, Geleijnse JM, Boer JM, Verschuren WM. Body mass index and waist circumference predict both 10-year nonfatal and fatal cardiovascular disease risk: study conducted in 20 000 Dutch men and women aged 20-65 years. *Eur J Cardiovasc Prev Rehabil*. 2009.
- (28) Wilhelmsen L, Johansson S, Rosengren A, Wallin I, Dotevall A, Lappas G. Risk factors for cardiovascular disease during the period 1985-1995 in Goteborg, Sweden. The GOT-MONICA Project. *J Intern Med*. 1997;242:199-211.
- (29) Price GM, Uauy R, Breeze E, Bulpitt CJ, Fletcher AE. Weight, shape, and mortality risk in older persons: elevated waist-hip ratio, not high body mass index, is associated with a greater risk of death. *Am J Clin Nutr*. 2006;84:449-460.
- (30) Reis JP, Macera CA, Araneta MR, Lindsay SP, Marshall SJ, Wingard DL. Comparison of overall obesity and body fat distribution in predicting risk of mortality. *Obesity (Silver Spring)*. 2009;17:1232-1239.
- (31) Davidson KW, Schwartz JE, Kirkland SA et al. Relation of inflammation to depression and incident coronary heart disease (from the Canadian Nova Scotia Health Survey [NSHS95] Prospective Population Study). *Am J Cardiol*. 2009;103:755-761.
- (32) Kitamura A, Sato S, Kiyama M et al. Trends in the incidence of coronary heart disease and stroke and their risk factors in Japan, 1964 to 2003: the Akita-Osaka study. *J Am Coll Cardiol*. 2008;52:71-79.
- (33) Pinto-Sietsma SJ, Navis G, Janssen WM, de ZD, Gans RO, de Jong PE. A central body fat distribution is related to renal function impairment, even in lean subjects. *Am J Kidney Dis*. 2003;41:733-741.
- (34) Gruson E, Montaye M, Kee F et al. Anthropometric assessment of abdominal obesity and coronary heart disease risk in men : the PRIME study. *Heart*. 2009.
- (35) Kim DJ, Bergstrom J, Barrett-Connor E, Laughlin GA. Visceral adiposity and subclinical coronary artery disease in elderly adults: Rancho Bernardo Study. *Obesity (Silver Spring)*. 2008;16:853-858.
- (36) Visscher TL, Seidell JC, Molarius A, van der KD, Hofman A, Witteman JC. A comparison of body mass index, waist-hip ratio and waist circumference as predictors of all-cause mortality among the elderly: the Rotterdam study. *Int J Obes Relat Metab Disord*. 2001;25:1730-1735.
- (37) Woodward M, Brindle P, Tunstall-Pedoe H. Adding social deprivation and family history to cardiovascular risk assessment: the ASSIGN score from the Scottish Heart Health Extended Cohort (SHHEC). *Heart*. 2007;93:172-176.
- (38) Welty TK, Lee ET, Yeh J et al. Cardiovascular disease risk factors among American Indians. The Strong Heart Study. *Am J Epidemiol*. 1995;142:269-287.
- (39) Onat A, Avci GS, Barlan MM, Uyarel H, Uzunlar B, Sansoy V. Measures of abdominal obesity assessed for visceral adiposity and relation to coronary risk. *Int J Obes Relat Metab Disord*. 2004;28:1018-1025.
- (40) Sakurai M, Miura K, Takamura T et al. Gender differences in the association between anthropometric indices of obesity and blood pressure in Japanese. *Hypertens Res*. 2006;29:75-80.
- (41) Borch KH, Braekkan SK, Mathiesen EB et al. Anthropometric Measures of Obesity and Risk of Venous Thromboembolism. The Tromso Study. *Arterioscler Thromb Vasc Biol*. 2009.
- (42) Riserus U, Ingelsson E. Alcohol intake, insulin resistance, and abdominal obesity in elderly men. *Obesity (Silver Spring)*. 2007;15:1766-1773.

- (43) Hamer M, Steptoe A. Prospective study of physical fitness, adiposity, and inflammatory markers in healthy middle-aged men and women. *Am J Clin Nutr.* 2009;89:85-89.
- (44) Gelber RP, Gaziano JM, Orav EJ, Manson JE, Buring JE, Kurth T. Measures of obesity and cardiovascular risk among men and women. *J Am Coll Cardiol.* 2008;52:605-615.
- (45) Canoy D, Boekholdt SM, Wareham N et al. Body fat distribution and risk of coronary heart disease in men and women in the European Prospective Investigation Into Cancer and Nutrition in Norfolk cohort: a population-based prospective study. *Circulation.* 2007;116:2933-2943.
- (46) Rimm EB, Stampfer MJ, Giovannucci E et al. Body size and fat distribution as predictors of coronary heart disease among middle-aged and older US men. *Am J Epidemiol.* 1995;141:1117-1127.
- (47) Rexrode KM, Carey VJ, Hennekens CH et al. Abdominal adiposity and coronary heart disease in women. *JAMA.* 1998;280:1843-1848.
- (48) Kaplan RC, McGinn AP, Baird AE et al. Inflammation and hemostasis biomarkers for predicting stroke in postmenopausal women: the Women's Health Initiative Observational Study. *J Stroke Cerebrovasc Dis.* 2008;17:344-355.
